# Supplementary material for: Integrated Proteomic and Metabolic Analysis of Breast Cancer Progression
Source: PubMed Central journal article supplement (PMC3785415; doi:10.1371/journal.pone.0076220), 2013-09-27
Supplement: pone.0076220.s001.pdf [file pone.0076220.s001.pdf]

|                |         |                                                                |      |      |      |      |      |       |      |      |      |      |      |      |
|----------------|---------|----------------------------------------------------------------|------|------|------|------|------|-------|------|------|------|------|------|------|
| NP_002799.3    | PSMD2   | 26S proteasome non-ATPase regulatory subunit 2                 | 1.07 | 1.28 | 2.95 | 1.31 | 1.83 | 4.50  | 0.95 | 1.22 | 1.54 | 0.57 | 1.03 | 2.44 |
| NP_004085.1    | EIF2S1  | eukaryotic translation initiation factor 2 subunit 1           | 1.16 | 1.21 | 2.93 |      |      |       |      |      |      |      |      |      |
| NP_038203.2    | IARS    | isoleucyl-tRNA synthetase, cytoplasmic                         | 1.32 | 1.60 | 2.91 | 1.57 | 2.01 | 4.40  |      |      |      |      |      |      |
| NP_000691.1    | ANXA1   | annexin A1                                                     | 1.42 | 1.37 | 2.89 | 1.96 | 2.14 | 5.44  | 1.40 | 1.16 | 1.51 | 1.03 | 1.47 | 2.47 |
| NP_001395.1    | EEF1G   | elongation factor 1-gamma                                      | 1.13 | 1.25 | 2.89 | 1.23 | 1.80 | 4.92  | 1.07 | 1.17 | 1.34 | 0.73 | 0.92 | 2.75 |
| NP_006382.1    | IPO7    | importin-7                                                     | 1.15 | 0.66 | 2.88 | 1.03 | 0.80 | 4.95  |      |      |      |      |      |      |
| NP_005678.3    | FARSB   | phenylalanyl-tRNA synthetase beta chain                        | 1.54 | 1.07 | 2.86 |      |      |       |      |      |      |      |      |      |
| NP_006592.3    | PTGES3  | prostaglandin E synthase 3                                     | 1.34 | 2.33 | 2.85 |      |      |       | 1.09 | 1.92 |      |      |      |      |
| NP_003742.2    | EIF3B   | eukaryotic translation initiation factor 3 subunit B           | 1.55 | 1.80 | 2.85 |      |      |       | 1.47 | 1.51 | 1.52 |      |      |      |
| NP_004332.2    | CAD     | CAD protein                                                    | 1.29 | 1.39 | 2.83 | 1.30 | 1.88 | 28.28 |      |      |      |      |      |      |
| NP_036205.1    | CCT5    | T-complex protein 1 subunit epsilon                            | 1.44 | 1.39 | 2.82 | 1.10 | 1.46 | 4.20  | 1.15 | 1.49 | 1.43 |      |      |      |
| NP_002291.1    | LDHB    | L-lactate dehydrogenase B chain                                | 1.25 | 2.66 | 2.78 | 1.35 | 3.79 | 4.31  | 1.14 | 2.34 | 1.32 | 0.78 | 2.71 | 2.12 |
| NP_005585.1    | NACA    | nascent polypeptide-associated complex subunit alpha isoform b | 1.21 | 1.75 | 2.75 | 1.06 | 2.27 | 3.75  |      |      |      |      |      |      |
| NP_006421.2    | CCT4    | T-complex protein 1 subunit delta                              | 1.19 | 1.23 | 2.73 | 1.00 | 1.76 | 3.88  | 1.18 | 1.25 | 1.43 |      |      |      |
| NP_056988.3    | EIF5B   | eukaryotic translation initiation factor 5B                    | 0.87 | 1.69 | 2.72 |      |      |       |      |      |      |      |      |      |
| NP_478126.1    | EXOSC6  | exosome complex component MTR3                                 | 1.12 | 0.84 | 2.71 |      |      |       |      |      |      |      |      |      |
| NP_001032752.1 | EEF1B2  | elongation factor 1-beta                                       | 1.06 | 1.16 | 2.71 | 1.11 | 1.55 | 4.86  | 1.13 | 1.29 | 1.53 |      | 0.91 |      |
| NP_000261.2    | PNP     | purine nucleoside phosphorylase                                | 0.96 | 1.01 | 2.68 | 1.32 | 1.68 | 6.47  |      |      |      |      |      |      |
| NP_000414.2    | KRT2    | keratin, type II cytoskeletal 2 epidermal                      | 0.07 | 0.07 | 2.65 |      |      |       |      |      |      | 0.05 | 0.05 | 4.32 |
| NP_001952.1    | EEF2    | elongation factor 2                                            | 0.97 | 1.25 | 2.65 | 1.16 | 1.72 | 4.86  | 0.90 | 1.09 | 1.27 | 0.41 | 0.92 | 1.66 |
| NP_114381.1    | EIF4H   | eukaryotic translation initiation factor 4H isoform 2          | 1.22 | 1.16 | 2.64 |      |      |       |      |      |      |      |      |      |
| NP_006182.2    | PA2G4   | proliferation-associated protein 2G4                           | 1.23 | 1.80 | 2.63 | 1.42 | 2.61 |       |      |      |      |      |      |      |
| NP_002793.2    | PSMC1   | 26S protease regulatory subunit 4                              | 1.08 | 1.17 | 2.62 |      |      |       |      |      |      |      |      |      |
| NP_002009.1    | FLII    | protein flightless-1 homolog                                   | 1.15 | 1.01 | 2.61 | 0.85 | 1.65 | 13.63 |      |      |      |      |      |      |
| NP_000980.1    | RPL30   | 60S ribosomal protein L30                                      | 1.47 | 1.22 | 2.59 |      |      |       |      |      |      |      |      |      |
| NP_064587.1    | NIT2    | omega-amidase NIT2                                             | 0.89 | 0.85 | 2.58 |      |      |       |      |      |      |      |      |      |
| NP_001307.2    | CSE1L   | exportin-2                                                     | 1.15 | 1.28 | 2.58 | 1.19 | 1.54 | 4.68  | 1.07 | 1.13 | 1.49 |      |      |      |
| NP_037473.3    | OLA1    | obg-like ATPase 1 isoform 1                                    | 0.98 | 1.34 | 2.58 | 0.16 | 1.77 | 1.09  | 0.86 | 1.15 | 1.17 |      |      |      |
| NP_002145.3    | HSPA4   | heat shock 70 kDa protein 4                                    | 1.19 | 1.39 | 2.55 | 1.26 | 1.88 | 4.30  | 1.27 | 1.26 | 1.42 | 0.81 | 1.38 | 2.67 |
| NP_001029025.1 | RPL3    | 60S ribosomal protein L3 isoform b                             | 1.15 | 1.51 | 2.50 | 1.31 | 2.10 |       | 1.13 | 1.31 | 1.22 |      |      |      |
| NP_001001.2    | RPS6    | 40S ribosomal protein S6                                       | 1.00 | 1.31 | 2.46 | 1.08 | 2.18 | 3.85  | 1.23 | 1.49 | 1.75 | 0.39 | 1.03 | 1.48 |
| NP_001159757.1 | CCT7    | T-complex protein 1 subunit eta isoform d                      | 1.05 | 1.26 | 2.44 | 1.16 | 1.70 | 4.23  | 1.00 | 1.25 | 1.21 |      |      |      |
| NP_056473.2    | NOC2L   | nucleolar complex protein 2 homolog                            | 1.72 | 1.26 | 2.43 |      |      |       |      |      |      |      |      |      |
| NP_003320.2    | TXN     | thioredoxin                                                    | 1.26 |      | 2.42 |      |      |       |      |      |      |      |      |      |
| NP_004437.2    | EPRS    | bifunctional aminoacyl-tRNA synthetase                         | 1.03 | 1.33 | 2.40 | 1.06 | 1.53 | 3.38  | 0.74 | 0.57 | 0.90 |      |      |      |
| NP_006588.1    | HSPA8   | heat shock cognate 71 kDa protein isoform 1                    | 0.95 | 1.22 | 2.40 | 1.21 | 1.93 | 4.61  | 1.01 | 1.24 | 1.40 | 0.63 | 1.27 | 2.29 |
| NP_000969.1    | RPL23   | 60S ribosomal protein L23                                      | 1.11 | 1.38 | 2.35 |      |      |       | 0.92 | 1.20 | 0.96 | 0.63 | 1.23 | 2.18 |
| NP_009057.1    | VCP     | transitional endoplasmic reticulum ATPase                      | 1.21 | 1.69 | 2.35 | 1.67 | 2.47 | 4.94  | 1.27 | 1.71 | 1.43 | 0.64 | 1.28 | 2.24 |
| NP_072045.1    | RPS18   | 40S ribosomal protein S18                                      | 1.09 | 1.29 | 2.31 |      |      |       | 1.12 | 1.31 | 1.24 | 0.55 | 0.87 | 2.03 |
| NP_002583.1    | PCNA    | proliferating cell nuclear antigen                             | 0.92 | 1.23 | 2.30 | 1.38 | 2.47 | 4.61  | 1.11 | 1.35 | 1.79 |      |      |      |
| NP_004490.2    | HNRNPAB | heterogeneous nuclear ribonucleoprotein A/B isoform b          | 1.04 | 1.24 | 2.29 |      |      |       |      |      |      |      |      |      |
| NP_000996.2    | RPS3    | 40S ribosomal protein S3                                       | 0.97 | 1.24 | 2.28 | 0.96 | 1.56 | 2.70  | 0.95 | 1.27 | 1.18 | 0.39 | 0.92 | 1.31 |
| NP_001009.1    | RPS15   | 40S ribosomal protein S15                                      | 1.13 | 1.37 | 2.27 |      |      |       | 0.11 | 1.09 | 0.15 | 0.39 | 0.97 | 1.31 |
| NP_596867.1    | ITGB1   | integrin beta-1 isoform 1A precursor                           | 1.12 | 1.13 | 2.26 | 0.88 | 2.25 | 7.40  |      |      |      | 0.77 | 2.77 | 6.03 |
| NP_004913.2    | SEC24C  | protein transport protein Sec24C                               | 0.79 | 0.79 | 2.25 |      |      |       |      |      |      |      |      |      |
| NP_002511.1    | NPM1    | nucleophosmin isoform 1                                        | 1.21 | 1.18 | 2.25 |      |      |       | 1.25 | 1.20 | 1.37 |      |      |      |
| NP_057212.1    | COPG    | coatomer subunit gamma                                         | 0.96 | 1.43 | 2.25 | 0.97 | 1.59 |       | 0.84 | 1.37 | 1.01 |      |      |      |

|                |          |                                                                    |      |      |      |      |      |       |      |      |      |      |      |      |
|----------------|----------|--------------------------------------------------------------------|------|------|------|------|------|-------|------|------|------|------|------|------|
| NP_000963.1    | RPL7A    | 60S ribosomal protein L7a                                          | 0.98 | 1.16 | 2.23 | 1.12 | 1.69 | 3.06  | 0.97 | 1.32 | 1.20 | 0.42 | 0.83 | 1.51 |
| NP_001180346.1 | DDX3X    | ATP-dependent RNA helicase DDX3X isoform 3                         | 1.08 | 1.36 | 2.23 |      |      |       |      |      |      |      |      |      |
| NP_006296.1    | ANP32A   | acidic leucine-rich nuclear phosphoprotein 32 family member A      | 0.99 | 1.11 | 2.22 | 1.24 | 1.72 | 3.82  | 1.05 | 1.29 | 1.07 |      |      |      |
| NP_006635.2    | HSPH1    | heat shock protein 105 kDa                                         | 1.18 | 1.66 | 2.22 | 1.68 | 2.55 | 5.18  |      |      |      |      |      |      |
| NP_001012321.1 | RPSA     | 40S ribosomal protein SA                                           | 1.08 | 1.26 | 2.22 | 1.19 | 1.48 |       | 7.96 | 1.16 | 8.64 | 0.50 | 0.92 | 1.54 |
| NP_573566.2    | LRPPRC   | leucine-rich PPR motif-containing protein, mitochondrial precursor | 1.05 | 1.24 | 2.21 |      |      |       |      |      |      |      |      | 1.14 |
| NP_112240.1    | ARPC5L   | actin-related protein 2/3 complex subunit 5-like protein           | 1.45 | 1.11 | 2.21 |      |      |       |      |      |      |      |      |      |
| NP_004598.1    | TBCA     | tubulin-specific chaperone A                                       | 0.97 | 1.30 | 2.19 |      |      |       |      |      |      |      |      |      |
| NP_002782.1    | PSMA6    | proteasome subunit alpha type-6                                    | 1.19 | 1.51 | 2.19 | 1.01 | 1.77 | 3.03  | 1.01 | 1.46 |      |      |      |      |
| NP_009123.1    | SUPT16H  | FACT complex subunit SPT16                                         | 1.27 | 1.16 | 2.19 |      |      |       | 0.84 | 0.96 | 0.90 |      |      |      |
| NP_000972.1    | RPL19    | 60S ribosomal protein L19                                          | 1.00 | 1.11 | 2.17 |      |      |       | 1.18 | 1.11 | 1.20 | 0.12 | 1.70 | 0.39 |
| NP_000983.1    | RPL29    | 60S ribosomal protein L29                                          | 0.95 | 1.16 | 2.16 |      |      |       | 0.86 | 1.11 | 1.04 | 0.38 | 0.81 | 1.37 |
| NP_001393.1    | EEF1A1   | elongation factor 1-alpha 1                                        | 0.81 | 0.94 | 2.15 | 0.89 | 1.28 | 4.28  | 0.70 | 0.88 | 1.09 | 0.44 | 0.64 | 2.08 |
| NP_002777.1    | PSMA1    | proteasome subunit alpha type-1 isoform 2                          | 1.01 | 1.52 | 2.15 | 1.13 | 1.77 | 3.08  | 0.97 | 1.41 | 1.17 |      |      |      |
| NP_004930.1    | DDX1     | ATP-dependent RNA helicase DDX1                                    | 0.91 | 0.82 | 2.14 |      |      |       |      |      |      |      |      |      |
| NP_055629.1    | PSMD6    | 26S proteasome non-ATPase regulatory subunit 6                     | 0.95 | 1.16 | 2.14 |      |      |       |      |      |      |      |      |      |
| NP_001186211.1 | LRBA     | lipopolysaccharide-responsive and beige-like anchor protein        | 0.73 | 0.84 | 2.14 | 0.88 | 1.57 | 8.85  |      |      |      |      |      |      |
| NP_444505.1    | RPLP0    | 60S acidic ribosomal protein P0                                    | 0.82 | 1.35 | 2.13 | 0.45 | 0.73 |       |      |      |      |      |      |      |
| NP_078934.3    | IPO4     | importin-4                                                         | 1.26 | 1.46 | 2.11 | 1.43 | 1.92 | 4.71  |      |      |      |      |      |      |
| NP_005608.1    | RPS14    | 40S ribosomal protein S14                                          | 1.05 | 1.36 | 2.11 |      |      |       | 1.02 | 1.29 | 1.21 | 0.55 | 1.01 | 1.94 |
| NP_000977.1    | RPL24    | 60S ribosomal protein L24                                          | 0.92 | 1.10 | 2.10 |      |      |       | 0.89 | 1.19 | 1.17 | 0.76 | 0.89 | 2.68 |
| NP_005339.3    | HSP90AA1 | heat shock protein HSP 90-alpha isoform 2                          | 1.10 | 1.66 | 2.10 | 1.29 | 2.20 | 3.88  | 1.12 | 1.60 | 1.46 | 0.82 | 1.47 | 2.19 |
| NP_000998.1    | RPS4X    | 40S ribosomal protein S4, X isoform X isoform                      | 0.95 | 1.25 | 2.10 | 1.09 | 1.85 | 2.91  | 0.88 | 1.17 | 1.06 | 0.54 | 0.98 | 1.83 |
| NP_001185986.1 | RPS17L   | 40S ribosomal protein S17-like                                     | 0.98 | 1.41 | 2.10 | 0.02 | 0.02 | 0.05  | 0.97 | 1.20 | 1.08 |      |      |      |
| NP_057154.2    | MRPS23   | 28S ribosomal protein S23, mitochondrial                           | 0.97 | 0.69 | 2.10 |      |      |       |      |      |      |      |      |      |
| NP_036555.1    | RPL13A   | 60S ribosomal protein L13a                                         | 1.04 | 1.35 | 2.09 |      |      |       | 0.85 | 1.17 | 1.04 | 0.44 | 0.74 | 1.70 |
| NP_110382.3    | TMX1     | thioredoxin-related transmembrane protein 1 precursor              | 1.24 | 1.01 | 2.09 |      |      |       |      |      |      |      |      |      |
| NP_150254.1    | RPL13    | 60S ribosomal protein L13 isoform 1                                | 1.01 | 1.19 | 2.08 | 1.19 | 1.67 | 3.16  | 1.11 | 1.22 | 1.21 |      |      |      |
| NP_148982.1    | RPS24    | 40S ribosomal protein S24 isoform a                                | 1.08 | 1.11 | 2.08 |      |      |       |      |      |      |      |      |      |
| NP_001008.1    | RPS13    | 40S ribosomal protein S13                                          | 0.94 | 1.20 | 2.07 | 5.70 | 1.20 | 15.55 | 0.85 | 1.42 | 1.05 | 0.43 | 0.92 | 1.49 |
| NP_001177966.1 | PSMD1    | 26S proteasome non-ATPase regulatory subunit 1 isoform 2           | 1.09 | 1.29 | 2.06 | 1.13 | 1.63 | 4.11  |      |      |      |      |      |      |
| NP_055950.1    | NUP205   | nuclear pore complex protein Nup205                                | 1.18 | 0.72 | 2.06 |      |      |       |      |      |      |      |      |      |
| NP_006004.2    | RPL10    | 60S ribosomal protein L10                                          | 1.10 | 1.19 | 2.06 |      |      |       |      |      |      |      |      |      |
| NP_003364.1    | VCL      | vinculin isoform VCL                                               | 0.66 | 1.02 | 2.06 | 0.64 | 1.22 | 2.81  | 0.63 | 0.84 | 1.19 |      | 1.07 |      |
| NP_687033.1    | PSMA3    | proteasome subunit alpha type-3 isoform 2                          | 1.17 | 1.47 | 2.06 | 1.33 | 2.00 | 3.37  | 0.71 | 1.05 | 0.72 | 0.57 | 0.97 | 1.96 |
| NP_001157791.1 | FLNB     | filamin-B isoform 4                                                | 1.06 | 0.47 | 2.06 | 1.08 | 0.75 | 4.76  | 1.10 | 0.44 | 1.27 | 0.77 | 0.74 | 4.19 |
| NP_056455.3    | SERBP1   | plasminogen activator inhibitor 1 RNA-binding protein isoform 4    | 0.94 | 1.20 | 2.05 | 1.23 | 1.58 | 3.08  | 0.99 | 1.35 | 1.26 |      |      |      |
| NP_000960.2    | RPL5     | 60S ribosomal protein L5                                           | 0.99 | 1.13 | 2.05 | 1.05 | 1.51 | 2.40  | 0.79 | 1.11 | 1.02 | 0.52 | 0.79 | 1.87 |
| NP_006576.2    | CCT8     | T-complex protein 1 subunit theta                                  | 1.09 | 1.58 | 2.04 | 1.15 | 1.67 | 4.49  | 1.23 | 0.14 | 1.85 |      |      |      |
| NP_002789.1    | PSMB6    | proteasome subunit beta type-6 precursor                           | 1.15 | 1.35 | 2.03 |      |      |       | 1.05 | 1.24 |      |      |      |      |
| NP_002127.1    | HNRNPA1  | heterogeneous nuclear ribonucleoprotein A1 isoform a               | 0.97 | 1.14 | 2.03 | 1.25 | 1.53 | 2.35  | 0.92 | 1.22 | 1.01 | 0.64 | 1.07 | 1.41 |
| NP_000971.1    | RPL18A   | 60S ribosomal protein L18a                                         | 0.94 | 1.73 | 2.02 |      |      |       | 0.88 | 1.16 |      | 0.40 | 0.91 | 1.36 |

|                |           |                                                             |      |      |      |      |      |      |      |      |      |      |      |      |
|----------------|-----------|-------------------------------------------------------------|------|------|------|------|------|------|------|------|------|------|------|------|
| NP_000984.1    | RPL31     | 60S ribosomal protein L31 isoform 1                         | 1.01 | 1.12 | 2.02 |      |      |      | 0.70 | 0.91 | 0.72 | 0.50 | 0.92 |      |
| NP_002943.2    | RPS2      | 40S ribosomal protein S2                                    | 0.89 | 1.17 | 2.02 | 1.05 | 1.64 | 3.19 | 0.95 | 1.21 | 1.31 | 0.42 | 0.82 | 1.45 |
| NP_001002.1    | RPS7      | 40S ribosomal protein S7                                    | 0.87 | 1.20 | 2.01 | 1.04 | 1.77 | 2.62 | 0.84 | 1.21 | 0.98 | 0.39 | 0.85 | 1.26 |
| NP_001951.2    | EEF1D     | elongation factor 1-delta isoform 2                         | 0.85 | 0.82 | 2.01 |      |      |      |      |      |      |      |      |      |
| NP_004406.2    | DSP       | desmoplakin isoform I                                       | 0.60 | 0.15 | 2.00 |      |      |      | 0.63 |      | 0.74 |      |      |      |
| NP_001367.2    | DYNC1H1   | cytoplasmic dynein 1 heavy chain 1                          | 0.81 | 0.92 | 2.00 | 0.84 | 1.30 | 3.72 | 1.11 | 0.86 | 1.29 | 0.51 | 0.68 | 2.43 |
| NP_036565.2    | SF3B1     | splicing factor 3B subunit 1 isoform 1                      | 0.98 | 1.19 | 2.00 |      |      |      |      |      |      |      |      |      |
| NP_009035.3    | RPL10A    | 60S ribosomal protein L10a                                  | 1.01 | 1.22 | 2.00 | 0.97 | 1.68 | 2.20 | 0.89 | 1.20 | 1.10 |      |      |      |
| NP_004300.1    | ARHGDI1A  | rho GDP-dissociation inhibitor 1 isoform a                  | 0.75 | 0.73 | 2.00 | 0.92 | 1.09 | 3.76 | 0.72 | 0.66 | 1.04 |      |      |      |
| NP_001128527.1 | TKT       | transketolase                                               | 0.75 | 1.08 | 1.99 | 1.09 | 1.81 | 3.81 | 0.75 | 0.91 | 1.09 | 0.60 | 1.03 | 2.65 |
| NP_001030168.1 | RPL14     | 60S ribosomal protein L14                                   | 1.02 | 1.18 | 1.98 | 0.82 | 1.43 | 1.95 | 0.89 | 1.08 | 1.30 | 0.46 | 0.81 | 1.67 |
| NP_006286.1    | VAR1      | valyl-tRNA synthetase                                       | 0.70 | 1.00 | 1.97 | 0.81 | 1.24 | 3.59 | 1.04 | 0.96 | 1.72 | 0.15 | 0.19 | 0.59 |
| NP_004362.2    | COPA      | coatamer subunit alpha isoform 2                            | 0.89 | 1.08 | 1.95 | 0.85 | 1.73 | 2.44 |      |      |      |      |      |      |
| NP_001030178.1 | RPL17     | 60S ribosomal protein L17 isoform a                         | 0.89 | 1.28 | 1.95 |      |      |      | 0.88 | 1.17 | 0.97 | 0.46 | 0.80 |      |
| NP_001019.1    | RPS25     | 40S ribosomal protein S25                                   | 0.88 | 1.23 | 1.95 |      |      |      | 0.95 | 1.26 | 1.12 |      |      |      |
| NP_004672.2    | EIF1AY    | eukaryotic translation initiation factor 1A, Y-chromosomal  | 0.94 | 0.89 | 1.94 |      |      |      | 1.06 | 0.86 |      |      |      |      |
| NP_003698.1    | RUVBL1    | ruvB-like 1                                                 | 1.01 | 1.27 | 1.92 | 1.22 | 1.56 | 3.66 |      |      |      | 0.87 | 1.24 | 2.85 |
| NP_000997.1    | RPS3A     | 40S ribosomal protein S3a                                   | 0.97 | 1.24 | 1.92 | 1.05 | 1.81 | 2.84 | 0.89 | 1.19 | 1.09 | 0.42 | 0.93 | 1.41 |
| NP_001020092.1 | RPL9      | 60S ribosomal protein L9                                    | 0.92 | 1.08 | 1.92 |      |      |      | 0.87 | 1.14 | 0.96 | 0.42 | 0.80 | 2.27 |
| NP_001020.2    | RPS26     | 40S ribosomal protein S26                                   | 0.86 | 1.22 | 1.92 | 0.93 | 1.35 | 2.57 |      |      |      | 0.47 | 0.87 | 1.48 |
| NP_000981.1    | RPL27A    | 60S ribosomal protein L27a                                  | 0.95 | 1.16 | 1.91 |      |      |      | 1.01 | 1.19 | 1.05 | 0.40 | 0.89 | 1.21 |
| NP_006422.1    | CCT2      | T-complex protein 1 subunit beta isoform 1                  | 0.88 | 1.23 | 1.91 | 0.89 | 1.54 | 3.47 |      |      |      |      |      |      |
| NP_000975.2    | RPL23A    | 60S ribosomal protein L23a                                  | 0.90 | 1.20 | 1.91 |      |      |      | 0.79 | 1.10 | 0.92 | 0.46 | 0.91 | 1.65 |
| NP_001553.1    | IL18      | interleukin-18 isoform 1 proprotein                         | 0.59 | 0.59 | 1.91 |      |      |      | 0.03 | 0.03 |      |      |      |      |
| NP_001072992.1 | PAICS     | multifunctional protein ADE2 isoform 2                      | 0.94 | 1.12 | 1.90 |      |      |      | 0.71 | 0.83 | 0.72 |      |      |      |
| NP_001027017.1 | CPT1A     | carnitine O-palmitoyltransferase 1, liver isoform isoform 2 | 1.32 | 1.57 | 1.89 |      |      |      |      |      |      |      |      |      |
| NP_001014.1    | RPS20     | 40S ribosomal protein S20 isoform 2                         | 0.96 | 1.26 | 1.89 |      |      |      | 1.04 | 1.18 | 1.27 | 0.44 | 0.99 | 1.50 |
| NP_000959.2    | RPL4      | 60S ribosomal protein L4                                    | 0.87 | 1.16 | 1.89 | 1.20 | 1.78 |      | 0.89 | 1.15 | 1.03 | 0.51 | 0.78 | 1.94 |
| NP_036457.1    | MAPRE1    | microtubule-associated protein RP/EB family member 1        | 0.76 | 0.87 | 1.89 | 0.78 | 1.12 | 0.52 | 0.80 | 0.93 | 1.01 |      |      |      |
| NP_001004.2    | RPS9      | 40S ribosomal protein S9                                    | 1.04 | 1.22 | 1.88 |      |      |      | 0.99 | 1.27 | 1.16 | 0.61 | 1.13 | 1.76 |
| NP_150644.1    | RPL8      | 60S ribosomal protein L8                                    | 0.94 | 1.19 | 1.88 | 1.14 | 1.69 | 2.91 | 0.93 | 1.16 | 1.06 | 0.45 | 0.84 | 1.40 |
| NP_009140.1    | RPL35     | 60S ribosomal protein L35                                   | 0.92 | 1.34 | 1.88 |      |      |      |      |      |      | 0.44 | 0.91 |      |
| NP_006827.1    | GCN1L1    | translational activator GCN1                                | 0.88 | 1.76 | 1.87 | 1.05 | 2.45 | 3.33 |      |      |      |      |      |      |
| NP_001010.2    | RPS15A    | 40S ribosomal protein S15a                                  | 0.93 | 1.28 | 1.87 |      |      |      | 0.88 | 1.24 | 1.06 | 0.45 | 0.79 | 1.62 |
| NP_001108628.1 | GDI2      | rab GDP dissociation inhibitor beta isoform 2               | 0.81 | 0.96 | 1.87 | 1.19 | 1.43 | 4.25 | 0.91 | 1.32 | 1.23 |      |      |      |
| NP_006112.3    | KRT1      | keratin, type II cytoskeletal 1                             | 0.04 | 0.04 | 1.87 |      |      |      | 0.01 | 0.01 | 0.77 | 0.03 | 0.03 | 2.45 |
| NP_000967.1    | RPL12     | 60S ribosomal protein L12                                   | 0.88 | 1.11 | 1.87 |      |      |      | 0.85 | 1.10 | 1.03 | 0.46 | 0.79 | 1.36 |
| NP_001005.1    | RPS10     | 40S ribosomal protein S10                                   | 0.94 | 1.12 | 1.86 | 1.17 | 1.69 | 3.50 | 0.43 | 1.75 | 0.40 |      |      |      |
| NP_005372.2    | NCL       | nucleolin                                                   | 1.11 | 1.10 | 1.86 | 2.53 | 2.04 |      | 1.05 | 1.12 | 1.06 | 1.09 | 1.19 | 2.93 |
| NP_060979.2    | LRRC59    | leucine-rich repeat-containing protein 59                   | 0.79 | 1.06 | 1.86 |      |      |      |      |      |      |      | 0.89 |      |
| NP_003503.1    | HIST1H2AC | histone H2A type 1-C                                        | 0.99 | 0.85 | 1.85 |      |      |      |      |      |      |      |      |      |
| NP_000961.2    | RPL6      | 60S ribosomal protein L6                                    | 0.94 | 1.25 | 1.84 |      |      |      | 1.01 | 1.25 | 1.26 | 0.36 | 0.89 | 1.32 |
| NP_005331.1    | HINT1     | histidine triad nucleotide-binding protein 1                | 1.02 | 1.15 | 1.84 |      |      |      | 1.00 | 0.88 | 1.04 |      |      |      |
| NP_001186731.1 | RPL11     | 60S ribosomal protein L11 isoform 2                         | 0.93 | 1.13 | 1.84 |      |      |      | 0.93 | 1.18 | 1.09 | 0.45 | 0.78 | 1.54 |
| NP_001011.1    | RPS16     | 40S ribosomal protein S16                                   | 0.96 | 1.12 | 1.84 |      |      |      | 0.93 | 1.58 | 1.02 | 0.49 | 1.15 | 1.73 |
| NP_004035.2    | ATIC      | bifunctional purine biosynthesis protein PURH               | 0.79 | 1.03 | 1.84 | 1.12 | 1.72 | 4.09 |      |      |      |      | 1.55 |      |



|                |              |                                                                    |      |      |      |      |      |      |      |      |      |      |      |      |  |
|----------------|--------------|--------------------------------------------------------------------|------|------|------|------|------|------|------|------|------|------|------|------|--|
| NP_001005335.1 | HNRNPL       | heterogeneous nuclear ribonucleoprotein L isoform b                | 1.04 | 0.89 | 1.64 |      |      |      |      |      |      |      |      |      |  |
| NP_003339.1    | UBE2N        | ubiquitin-conjugating enzyme E2 N                                  | 0.80 | 1.25 | 1.64 |      |      |      | 0.70 | 1.02 | 0.85 |      |      |      |  |
| NP_061819.2    | NANS         | sialic acid synthase                                               | 0.82 | 0.87 | 1.64 | 1.06 | 1.46 |      |      |      |      |      |      |      |  |
| NP_002130.2    | RBMX         | heterogeneous nuclear ribonucleoprotein G isoform 1                | 0.77 | 0.89 | 1.63 |      |      |      | 0.98 | 1.24 | 0.99 |      |      |      |  |
| NP_001030611.1 | FAM129B      | niban-like protein 1 isoform 2                                     | 1.10 | 0.87 | 1.63 | 1.13 | 1.33 | 2.64 | 1.40 | 1.08 | 1.23 | 0.86 | 1.68 | 4.24 |  |
| NP_001036816.1 | TPM3         | tropomyosin alpha-3 chain isoform 4                                | 0.61 | 0.52 | 1.62 | 0.58 | 0.73 |      | 0.57 | 0.49 | 0.68 |      |      |      |  |
| NP_004492.2    | HNRNPU       | heterogeneous nuclear ribonucleoprotein U isoform b                | 0.97 | 1.07 | 1.62 |      |      |      | 1.13 | 1.23 | 1.04 | 0.86 | 0.91 | 2.23 |  |
| NP_057215.3    | RAB10        | ras-related protein Rab-10                                         | 0.73 | 0.84 | 1.62 | 0.64 | 1.03 | 2.68 |      |      |      | 0.44 | 1.55 |      |  |
| NP_006752.1    | YWHAE        | 14-3-3 protein epsilon                                             | 0.79 | 0.85 | 1.61 | 0.86 | 1.12 | 2.38 | 0.78 | 0.77 | 0.90 | 0.52 | 1.00 | 2.07 |  |
| NP_006316.1    | RAN          | GTP-binding nuclear protein Ran                                    | 0.81 | 1.44 | 1.60 | 1.45 | 2.73 | 4.38 | 0.79 | 1.21 | 0.94 | 0.57 | 1.17 | 1.61 |  |
| NP_003008.1    | SRSF3        | serine/arginine-rich splicing factor 3                             | 0.99 | 1.02 | 1.59 | 1.12 | 1.95 |      | 0.95 | 1.05 | 0.82 |      |      |      |  |
| NP_001419.1    | ENO1         | alpha-enolase isoform 1                                            | 0.73 | 1.11 | 1.59 | 0.89 | 1.67 | 2.79 | 0.68 | 0.95 | 0.79 | 0.43 | 1.10 | 1.46 |  |
| NP_000973.2    | RPL21        | 60S ribosomal protein L21                                          | 0.91 | 1.16 | 1.59 | 1.20 | 1.68 | 2.55 | 0.95 | 1.19 | 1.13 | 0.38 | 0.72 | 1.05 |  |
| NP_001070911.1 | HNRNPC       | heterogeneous nuclear ribonucleoproteins C1/C2 isoform b           | 0.80 | 1.24 | 1.58 |      |      |      |      |      |      |      |      |      |  |
| NP_002070.1    | GOT1         | aspartate aminotransferase, cytoplasmic                            | 1.03 | 1.09 | 1.57 |      | 2.35 | 0.00 |      |      |      |      |      |      |  |
| NP_005310.1    | HIST1H1C     | histone H1.2                                                       | 0.56 | 0.92 | 1.57 |      |      |      | 0.71 | 0.90 | 1.23 | 0.63 | 1.09 | 1.20 |  |
| NP_001198.2    | BTF3         | transcription factor BTF3 isoform B                                | 0.64 | 2.18 | 1.57 |      |      |      | 1.05 | 1.60 | 1.44 |      |      |      |  |
| NP_001138882.1 | NONO         | non-POU domain-containing octamer-binding protein isoform 2        | 0.78 | 1.02 | 1.57 |      |      |      |      |      |      |      |      |      |  |
| NP_002873.1    | RANBP1       | ran-specific GTPase-activating protein                             | 0.71 | 0.71 | 1.56 |      |      |      |      |      |      |      |      |      |  |
| NP_003472.2    | USP5         | ubiquitin carboxyl-terminal hydrolase 5 isoform 2                  | 0.64 | 1.36 | 1.56 |      |      |      | 1.11 | 2.97 |      |      |      |      |  |
| NP_000843.1    | GSTP1        | glutathione S-transferase P                                        | 0.71 | 0.80 | 1.56 | 0.59 |      | 1.91 | 0.69 | 0.64 | 0.74 | 0.44 | 0.81 | 1.17 |  |
| NP_001116293.1 | SET          | protein SET isoform 1                                              | 0.91 | 0.47 | 1.55 |      |      |      | 1.09 | 0.80 |      |      |      |      |  |
| NP_001171691.1 | CLTA         | clathrin light chain A isoform f                                   | 0.46 | 6.68 | 1.55 |      |      |      |      |      |      |      |      |      |  |
| NP_703194.1    | ILF3         | interleukin enhancer-binding factor 3 isoform c                    | 0.85 | 1.16 | 1.55 |      |      |      | 1.01 | 1.28 | 1.02 |      |      |      |  |
| NP_003396.1    | YWHAH        | 14-3-3 protein eta                                                 | 0.57 | 0.49 | 1.55 | 0.61 | 0.58 | 2.76 | 0.54 | 0.44 | 0.74 |      |      |      |  |
| NP_036220.1    | PGLS         | 6-phosphogluconolactonase                                          | 0.57 | 0.57 | 1.55 | 0.74 | 0.79 | 2.16 |      |      |      |      |      |      |  |
| NP_060918.2    | CAND1        | cullin-associated NEDD8-dissociated protein 1                      | 0.83 | 1.35 | 1.54 | 0.94 | 2.14 | 2.42 | 0.95 | 1.57 |      |      |      |      |  |
| XP_003119578.1 | LOC100507855 | adenylate kinase isoenzyme 4, mitochondrial-like                   | 0.89 | 0.60 | 1.54 |      |      |      |      |      |      |      |      |      |  |
| NP_001348.2    | DHX9         | ATP-dependent RNA helicase A                                       | 0.97 | 0.98 | 1.52 |      |      |      | 1.07 | 0.97 | 0.90 |      |      |      |  |
| NP_001410.2    | ELAVL1       | ELAV-like protein 1                                                | 0.86 | 1.09 | 1.52 |      |      |      | 0.55 | 0.77 | 0.64 |      |      |      |  |
| NP_055205.2    | SND1         | staphylococcal nuclease domain-containing protein 1                | 0.87 | 1.25 | 1.52 |      |      |      | 0.79 | 1.18 | 0.67 | 0.46 | 1.01 | 1.33 |  |
| NP_004960.2    | IDE          | insulin-degrading enzyme isoform 1 precursor                       | 0.80 | 1.30 | 1.51 |      |      |      |      |      |      |      |      |      |  |
| NP_001349.2    | DHX15        | putative pre-mRNA-splicing factor ATP-dependent RNA helicase DHX15 | 0.92 | 1.02 | 1.50 | 2.14 | 2.41 |      | 1.26 | 0.95 | 1.62 |      |      |      |  |
| NP_000174.1    | HADHB        | trifunctional enzyme subunit beta, mitochondrial precursor         | 0.79 | 0.72 | 1.49 |      |      |      | 0.78 | 0.88 | 0.83 |      |      |      |  |
| NP_004125.3    | HSPA9        | stress-70 protein, mitochondrial precursor                         | 1.16 | 1.23 | 1.49 | 1.01 | 1.19 | 1.80 | 1.18 | 1.30 | 0.91 | 0.70 | 1.27 | 1.60 |  |
| NP_038470.1    | STOML2       | stomatin-like protein 2                                            | 1.11 | 1.06 | 1.49 |      |      |      |      |      |      | 0.64 | 1.09 | 1.42 |  |
| NP_004574.2    | RAB5C        | ras-related protein Rab-5C isoform b                               | 0.83 | 1.19 | 1.48 |      |      |      | 0.91 | 1.00 |      | 0.74 | 1.63 |      |  |
| NP_056461.1    | RAP1B        | ras-related protein Rap-1b precursor                               | 0.70 | 1.34 | 1.48 |      |      |      |      |      |      |      |      |      |  |
| NP_002625.1    | PHB          | prohibitin                                                         | 0.90 | 1.15 | 1.47 |      |      |      | 0.82 | 1.18 | 0.76 | 0.52 | 1.12 | 1.45 |  |
| NP_001116847.1 | HIST2H3D     | histone H3.2                                                       | 0.81 | 0.73 | 1.47 |      |      |      | 0.80 | 0.82 | 0.85 | 0.68 | 0.71 | 1.20 |  |
| NP_114368.1    | PTBP1        | polypyrimidine tract-binding protein 1 isoform c                   | 0.98 | 0.91 | 1.47 |      |      |      | 0.92 | 0.83 | 0.70 |      |      |      |  |
| NP_073591.2    | SFXN1        | sideroflexin-1                                                     | 1.01 | 1.10 | 1.46 |      |      |      | 1.14 | 1.38 | 0.90 |      |      |      |  |
| NP_002620.1    | PGAM1        | phosphoglycerate mutase 1                                          | 0.59 | 0.87 | 1.46 | 0.78 | 1.42 | 2.60 | 0.61 | 0.73 | 0.83 | 0.44 | 0.89 | 1.45 |  |
| NP_733821.1    | LMNA         | prelamin-A/C isoform 1 precursor                                   | 0.67 | 0.59 | 1.46 |      |      |      |      |      |      |      |      |      |  |
| NP_001186128.1 | AK2          | adenylate kinase 2, mitochondrial isoform c                        | 0.83 | 0.71 | 1.45 |      |      |      | 0.83 | 0.83 | 0.77 | 0.52 | 0.75 | 2.04 |  |

|                |           |                                                                                                                  |      |      |      |      |      |      |      |      |      |      |      |      |
|----------------|-----------|------------------------------------------------------------------------------------------------------------------|------|------|------|------|------|------|------|------|------|------|------|------|
| NP_005753.1    | TRIM28    | transcription intermediary factor 1-beta                                                                         | 1.00 | 1.40 | 1.44 |      |      |      | 1.33 | 1.93 | 1.19 |      |      |      |
| NP_005733.1    | PDIA6     | protein disulfide-isomerase A6 precursor                                                                         | 0.73 | 1.14 | 1.43 |      |      |      |      |      |      | 0.30 | 0.59 | 0.80 |
| NP_112480.2    | HNRNPM    | heterogeneous nuclear ribonucleoprotein M isoform b                                                              | 0.93 | 0.94 | 1.42 |      |      |      | 1.15 | 1.16 | 1.00 |      |      |      |
| NP_004896.1    | PRDX6     | peroxiredoxin-6                                                                                                  | 0.93 | 1.05 | 1.42 | 1.00 | 1.46 | 2.32 | 0.74 | 0.89 | 0.56 | 0.50 | 0.86 |      |
| NP_001156758.1 | EWSR1     | RNA-binding protein EWS isoform 4                                                                                | 0.76 | 0.89 | 1.42 | 1.69 | 1.94 |      | 0.74 | 0.84 | 0.81 |      |      |      |
| NP_000173.2    | HADHA     | trifunctional enzyme subunit alpha, mitochondrial precursor                                                      | 0.65 | 0.72 | 1.41 |      |      |      |      |      |      | 0.50 | 0.85 | 1.55 |
| NP_005947.3    | MTHFD1    | C-1-tetrahydrofolate synthase, cytoplasmic                                                                       | 0.73 | 0.75 | 1.41 | 0.82 | 0.95 | 2.42 | 0.67 | 0.76 | 0.74 |      |      |      |
| NP_004850.1    | CLTC      | clathrin heavy chain 1                                                                                           | 0.71 | 0.88 | 1.40 | 0.85 | 1.46 | 2.67 | 0.69 | 0.93 | 0.81 | 0.56 | 1.32 | 2.55 |
| NP_116120.1    | TXNDC17   | thioredoxin domain-containing protein 17                                                                         | 1.06 | 0.80 | 1.40 |      |      |      |      |      |      |      |      |      |
| NP_001070674.1 | SEC31A    | protein transport protein Sec31A isoform 4                                                                       | 0.76 | 1.05 | 1.39 |      |      |      |      |      |      |      |      |      |
| NP_113584.3    | HUWE1     | E3 ubiquitin-protein ligase HUWE1                                                                                | 0.93 | 0.70 | 1.39 | 1.01 | 0.91 | 2.34 |      |      |      |      |      |      |
| NP_001138303.1 | PHB2      | prohibitin-2 isoform 1                                                                                           | 0.90 | 1.15 | 1.39 |      |      |      | 0.88 | 1.32 | 0.77 | 0.53 | 1.14 | 1.32 |
| NP_003555.1    | TAGLN2    | transgelin-2                                                                                                     | 0.52 | 0.63 | 1.38 | 0.57 | 0.87 | 2.36 | 0.42 | 0.51 | 0.59 | 0.31 | 0.85 | 1.87 |
| NP_005773.3    | THOC4     | THO complex subunit 4                                                                                            | 0.96 | 1.05 | 1.38 |      |      |      | 1.19 | 1.22 | 0.97 |      |      |      |
| NP_001596.2    | AARS      | alanyl-tRNA synthetase, cytoplasmic                                                                              | 0.46 | 0.84 | 1.37 | 0.52 | 1.11 |      | 0.49 | 0.69 |      |      |      |      |
| NP_001273.1    | AP2B1     | AP-2 complex subunit beta isoform b                                                                              | 0.79 | 1.03 | 1.36 |      |      |      |      |      |      | 0.83 | 2.03 | 2.81 |
| NP_066299.2    | MYL6      | myosin light polypeptide 6 isoform 1                                                                             | 0.63 | 0.57 | 1.36 | 0.58 | 0.73 | 2.12 | 0.67 | 0.54 | 0.80 | 0.38 | 0.98 | 1.43 |
| NP_006704.3    | SUB1      | activated RNA polymerase II transcriptional coactivator p15                                                      | 0.83 | 0.92 | 1.35 |      |      |      | 0.76 | 1.08 | 0.79 |      |      |      |
| NP_002256.2    | KPNB1     | importin subunit beta-1                                                                                          | 0.79 | 0.97 | 1.35 | 0.92 | 1.35 | 2.62 | 0.92 | 0.95 | 0.85 | 0.67 | 0.98 | 1.62 |
| NP_002939.2    | RPL15     | 60S ribosomal protein L15                                                                                        | 0.67 | 1.08 | 1.35 |      |      |      | 0.84 | 1.23 | 1.04 | 0.44 | 0.87 | 1.59 |
| NP_068831.1    | JUP       | junction plakoglobin                                                                                             | 0.50 | 0.10 | 1.35 |      |      |      | 0.09 | 0.02 | 0.11 | 0.27 | 0.32 | 3.31 |
| NP_036558.3    | SF3B3     | splicing factor 3B subunit 3                                                                                     | 0.78 | 1.15 | 1.34 |      |      |      |      |      |      |      |      |      |
| NP_001144.1    | ANXA4     | annexin A4                                                                                                       | 0.59 | 0.35 | 1.34 | 0.78 | 0.64 | 2.41 |      | 0.42 |      | 0.59 | 0.59 | 1.52 |
| NP_112533.1    | HNRNPA2B1 | heterogeneous nuclear ribonucleoproteins A2/B1 isoform B1                                                        | 0.92 | 0.87 | 1.34 |      |      |      | 0.92 | 0.91 |      |      |      |      |
| NP_001782.1    | CDC42     | cell division control protein 42 homolog isoform 1                                                               | 0.61 | 0.55 | 1.33 | 0.68 | 0.70 | 2.43 | 0.55 | 0.44 | 0.43 | 0.37 | 1.08 | 0.69 |
| NP_001122326.1 | SRRT      | serrate RNA effector molecule homolog isoform e                                                                  | 0.74 | 1.35 | 1.32 |      |      |      |      |      |      |      |      |      |
| NP_821133.1    | TUBB      | tubulin beta chain                                                                                               | 0.56 | 0.64 | 1.32 | 0.67 | 0.97 | 2.75 | 0.58 | 0.60 | 0.82 | 0.61 | 0.77 | 2.46 |
| NP_002119.1    | HMGB1     | high mobility group protein B1                                                                                   | 0.76 | 0.83 | 1.32 | 0.94 | 1.29 |      | 0.69 | 0.79 | 0.86 | 0.69 | 0.92 | 1.90 |
| NP_005057.1    | SFPQ      | splicing factor, proline- and glutamine-rich                                                                     | 0.97 | 1.14 | 1.32 |      |      |      | 0.96 | 1.25 | 0.79 |      |      |      |
| NP_001001329.1 | PRKCSH    | glucosidase 2 subunit beta isoform 2                                                                             | 0.34 | 0.88 | 1.31 |      |      |      | 0.45 | 0.95 | 0.54 |      |      |      |
| NP_620119.2    | BAX       | apoptosis regulator BAX isoform sigma                                                                            | 0.70 | 0.91 | 1.30 | 1.02 | 1.41 | 2.77 | 0.55 | 0.80 |      | 0.58 | 1.25 |      |
| NP_006462.1    | MYL12A    | myosin regulatory light chain 12A                                                                                | 0.55 | 0.67 | 1.30 |      |      |      | 0.74 | 0.59 |      |      |      |      |
| NP_002147.2    | HSPD1     | 60 kDa heat shock protein, mitochondrial                                                                         | 0.88 | 1.02 | 1.29 | 0.75 | 1.07 | 1.78 | 0.90 | 1.14 | 0.76 | 0.47 | 0.97 | 1.09 |
| NP_066964.1    | XRCC5     | X-ray repair cross-complementing protein 5                                                                       | 0.79 | 0.96 | 1.28 | 1.30 | 1.84 |      | 0.99 | 0.89 | 0.94 |      |      |      |
| NP_570603.2    | AP2A1     | AP-2 complex subunit alpha-1 isoform 2                                                                           | 0.80 | 1.18 | 1.28 |      |      |      |      |      |      |      |      |      |
| NP_005713.1    | ACTR2     | actin-related protein 2 isoform b                                                                                | 0.64 | 0.75 | 1.28 |      |      |      |      |      |      |      |      |      |
| NP_037506.2    | PDCD6IP   | programmed cell death 6-interacting protein isoform 1                                                            | 0.54 | 0.55 | 1.27 | 0.61 | 0.65 | 2.56 | 0.49 | 0.43 | 0.61 |      |      |      |
| NP_001924.2    | DLST      | dihydrolipoyllysine-residue succinyltransferase component of 2-oxoglutarate dehydrogenase complex, mitochondrial | 0.70 |      | 1.25 |      |      |      | 0.54 | 0.73 |      | 0.21 | 0.29 | 0.56 |
| NP_004777.1    | TXNL1     | thioredoxin-like protein 1                                                                                       | 0.76 | 1.27 | 1.25 |      |      |      |      |      |      |      |      |      |
| NP_061828.1    | UBB       | polyubiquitin-B precursor                                                                                        | 0.76 | 0.71 | 1.24 |      |      |      | 0.67 | 0.72 | 0.85 | 0.59 | 1.43 | 3.68 |
| NP_003676.2    | KHSRP     | far upstream element-binding protein 2                                                                           | 0.87 | 1.07 | 1.24 |      |      |      |      |      |      |      |      |      |
| NP_000994.1    | RPLP1     | 60S acidic ribosomal protein P1 isoform 1                                                                        | 0.64 | 1.29 | 1.24 | 1.11 | 1.46 | 2.83 | 0.94 | 1.07 | 1.07 | 0.39 | 0.79 | 1.17 |
| NP_001159491.1 | AP1B1     | AP-1 complex subunit beta-1 isoform c                                                                            | 0.57 | 0.58 | 1.23 |      |      |      | 0.56 | 1.74 |      | 0.42 | 0.73 | 1.70 |

|                |           | neuroblast differentiation-associated protein AHNAK isoform                                                            |      |      |      |      |      |      |      |      |      |      |      |      |
|----------------|-----------|------------------------------------------------------------------------------------------------------------------------|------|------|------|------|------|------|------|------|------|------|------|------|
| NP_001611.1    | AHNAK     | 1                                                                                                                      | 0.70 | 0.47 | 1.23 | 0.80 | 0.82 | 5.26 | 0.69 | 0.47 | 0.56 | 0.52 | 0.87 | 3.90 |
| NP_005013.1    | PFN1      | profilin-1                                                                                                             | 0.61 | 0.64 | 1.23 | 0.84 | 0.91 | 2.71 | 0.60 | 0.63 | 0.70 | 0.03 | 0.03 |      |
| NP_008937.1    | NUDT21    | cleavage and polyadenylation specificity factor subunit 5 single-stranded DNA-binding protein, mitochondrial precursor | 0.75 | 0.91 | 1.22 |      |      |      |      |      |      |      |      |      |
| NP_003134.1    | SSBP1     |                                                                                                                        | 0.80 | 0.82 | 1.22 |      |      |      | 0.87 | 0.89 | 0.72 | 0.55 | 0.99 |      |
| NP_647539.1    | YWHAB     | 14-3-3 protein beta/alpha                                                                                              | 0.74 | 0.61 | 1.21 | 0.72 | 0.83 | 1.90 | 0.64 | 0.61 | 0.57 | 0.58 | 0.89 | 2.25 |
| NP_066953.1    | PPIA      | peptidyl-prolyl cis-trans isomerase A                                                                                  | 0.64 | 0.73 | 1.21 | 1.00 | 1.77 | 2.66 | 0.59 | 0.62 | 0.56 | 0.40 | 0.69 | 1.42 |
| NP_066544.1    | HIST1H2AJ | histone cluster 1, H2aj                                                                                                | 0.66 | 0.68 | 1.21 | 0.54 | 0.60 | 1.06 | 0.77 | 0.74 | 0.85 | 0.65 | 0.69 | 1.25 |
| NP_004784.2    | LONP1     | lon protease homolog, mitochondrial precursor                                                                          | 0.82 | 0.84 | 1.20 |      |      |      | 1.23 | 1.42 |      |      |      |      |
| NP_002564.1    | PAFAH1B3  | platelet-activating factor acetylhydrolase IB subunit gamma                                                            | 0.92 | 0.78 | 1.19 | 1.27 | 1.29 |      |      |      |      |      |      |      |
| NP_067676.2    | HNRNPH3   | heterogeneous nuclear ribonucleoprotein H3 isoform b endoplasmic reticulum resident protein 29 isoform 1 precursor     | 0.88 | 0.82 | 1.19 |      |      |      |      |      |      |      |      |      |
| NP_006808.1    | ERP29     |                                                                                                                        | 0.49 | 1.13 | 1.19 |      |      |      | 0.49 | 1.23 |      | 0.10 | 0.19 | 0.29 |
| NP_064505.1    | UGGT1     | UDP-glucose:glycoprotein glucosyltransferase 1 precursor                                                               | 0.56 | 1.01 | 1.18 |      |      |      |      |      |      |      |      |      |
| NP_001186041.1 | MDH1      | malate dehydrogenase, cytoplasmic isoform 3                                                                            | 0.74 | 0.91 | 1.18 | 0.98 | 1.35 | 2.43 | 0.71 | 0.85 | 0.51 | 0.52 | 0.92 | 1.35 |
| NP_001737.1    | CANX      | calnexin precursor                                                                                                     | 0.67 | 1.19 | 1.18 |      |      |      | 0.67 | 1.22 | 0.65 | 0.23 | 0.76 | 0.63 |
| NP_003861.1    | IQGAP1    | ras GTPase-activating-like protein IQGAP1                                                                              | 0.75 | 0.41 | 1.18 | 0.68 | 0.51 | 2.31 | 0.76 | 0.33 | 0.60 | 0.45 | 0.91 | 1.78 |
| NP_064601.3    | RNPEP     | aminopeptidase B                                                                                                       | 0.60 | 0.46 | 1.18 |      |      |      |      |      |      |      |      |      |
| NP_001145.1    | ANXA5     | annexin A5                                                                                                             | 1.03 | 1.16 | 1.18 | 1.30 | 1.73 | 2.33 | 1.03 | 1.10 | 0.62 | 0.62 | 1.15 | 0.81 |
| NP_003325.2    | UBA1      | ubiquitin-like modifier-activating enzyme 1                                                                            | 0.87 | 0.79 | 1.17 | 1.16 | 1.21 | 2.27 | 0.82 | 0.71 | 0.58 | 0.55 | 0.71 | 0.87 |
| NP_001509.3    | GTF2I     | general transcription factor II-I isoform 4                                                                            | 0.79 | 0.94 | 1.17 |      |      |      | 0.01 | 0.01 |      |      |      |      |
| NP_944490.1    | SRI       | sorcিন isoform b                                                                                                       | 0.50 | 0.54 | 1.16 |      |      |      | 0.43 | 0.46 |      |      |      |      |
| NP_775083.1    | CAST      | calpastatin isoform b                                                                                                  | 0.37 | 0.60 | 1.16 | 0.46 | 0.95 | 3.03 |      |      |      |      |      |      |
| NP_006380.1    | HYOU1     | hypoxia up-regulated protein 1 precursor                                                                               | 0.94 | 1.76 | 1.16 | 0.56 | 1.27 | 1.28 |      |      |      |      |      |      |
| NP_057310.1    | VPS29     | vacuolar protein sorting-associated protein 29 isoform 1                                                               | 0.59 | 0.67 | 1.16 |      |      |      |      |      |      |      |      |      |
| NP_001119523.1 | HDGF      | hepatoma-derived growth factor isoform c                                                                               | 0.58 | 0.76 | 1.16 | 0.60 | 1.06 |      |      |      |      |      |      |      |
| NP_001894.2    | CTNNA1    | catenin alpha-1                                                                                                        | 0.76 | 0.34 | 1.16 | 0.86 | 0.53 | 9.00 | 0.85 | 0.47 | 0.56 | 0.72 | 0.93 | 3.16 |
| NP_001738.2    | CAPG      | macrophage-capping protein                                                                                             | 0.71 | 0.27 | 1.16 | 1.07 | 0.85 | 3.34 |      |      |      | 0.58 | 0.31 | 1.19 |
| NP_004334.1    | CALR      | calreticulin precursor                                                                                                 | 0.42 | 0.87 | 1.15 |      |      |      |      |      |      | 0.04 | 0.04 | 0.14 |
| NP_004921.1    | CAPZB     | F-actin-capping protein subunit beta isoform 1                                                                         | 0.70 | 1.14 | 1.15 |      |      |      |      |      |      | 0.46 | 1.09 | 2.29 |
| NP_001093640.1 | IMMT      | mitochondrial inner membrane protein isoform 3                                                                         | 0.73 | 0.78 | 1.15 |      |      |      | 0.71 | 0.97 | 0.60 |      |      |      |
| NP_001121134.1 | GSN       | gelsolin isoform b                                                                                                     | 0.46 | 0.20 | 1.14 | 0.58 | 0.25 | 2.42 | 0.55 | 0.17 | 0.61 | 0.15 | 0.11 | 0.62 |
| NP_001166.3    | ARHGDI2   | rho GDP-dissociation inhibitor 2                                                                                       | 1.17 | 0.52 | 1.14 |      |      |      |      |      |      |      |      |      |
| NP_001078936.1 | CTNND1    | catenin delta-1 isoform 3A                                                                                             | 0.75 | 0.30 | 1.13 |      |      |      | 0.97 | 0.38 | 0.69 | 0.75 | 0.80 | 3.21 |
| NP_001895.1    | CTNNA1    | catenin beta-1                                                                                                         | 0.81 | 0.36 | 1.13 |      |      |      |      |      |      |      |      |      |
| NP_002037.2    | GAPDH     | glyceraldehyde-3-phosphate dehydrogenase                                                                               | 0.56 | 1.26 | 1.13 | 0.65 | 1.82 | 2.29 | 0.55 | 1.07 | 0.62 | 0.37 | 1.20 | 1.25 |
| NP_001011553.2 | SEPT7     | septin-7 isoform 2                                                                                                     | 0.53 | 0.61 | 1.12 |      |      |      |      |      |      |      | 1.11 |      |
| NP_000933.1    | PPIB      | peptidyl-prolyl cis-trans isomerase B precursor                                                                        | 0.70 | 1.17 | 1.12 |      |      |      | 0.66 | 1.27 | 0.59 | 0.30 | 0.70 | 0.73 |
| NP_001132913.1 | BCAP31    | B-cell receptor-associated protein 31 isoform b                                                                        | 0.65 | 0.91 | 1.11 |      |      |      |      |      |      | 0.28 | 0.59 | 0.87 |
| NP_005887.2    | IDH1      | isocitrate dehydrogenase [NADP] cytoplasmic                                                                            | 0.55 | 0.59 | 1.11 | 0.53 | 0.60 | 1.35 | 0.55 | 0.57 | 0.51 |      |      |      |
| NP_057226.1    | HSD17B12  | estradiol 17-beta-dehydrogenase 12                                                                                     | 0.19 | 0.32 | 1.11 |      |      |      | 0.22 | 0.45 |      |      | 0.33 |      |
| NP_002097.1    | H2AFZ     | histone H2A.Z                                                                                                          | 0.49 | 0.60 | 1.10 |      |      |      | 0.51 | 0.60 | 0.61 |      |      |      |
| NP_005304.3    | PDIA3     | protein disulfide-isomerase A3 precursor                                                                               | 0.70 | 0.89 | 1.10 | 0.46 | 0.92 | 1.00 | 0.73 | 1.02 | 0.62 | 0.25 | 0.49 | 0.57 |
| NP_003536.1    | HIST1H4E  | histone H4                                                                                                             | 0.66 | 0.57 | 1.10 |      |      |      | 0.67 | 0.69 | 0.66 | 0.54 | 0.54 | 0.71 |



|                |         |                                                                                    |      |      |      |      |      |      |      |      |      |      |      |      |
|----------------|---------|------------------------------------------------------------------------------------|------|------|------|------|------|------|------|------|------|------|------|------|
| NP_938148.1    | GANAB   | neutral alpha-glucosidase AB isoform 2                                             | 0.73 | 1.05 | 1.09 |      |      |      | 0.66 | 1.08 | 0.54 | 0.33 | 0.58 | 0.78 |
| NP_940684.1    | PTPLB   | 3-hydroxyacyl-CoA dehydratase 2                                                    | 0.39 | 0.43 | 1.09 |      |      |      | 0.12 | 0.13 | 0.16 | 0.16 | 0.34 | 0.82 |
| NP_001092.1    | ACTB    | actin, cytoplasmic 1                                                               | 0.81 | 0.84 | 1.09 | 0.92 | 1.25 | 2.90 | 0.81 | 0.77 | 0.95 | 0.56 | 1.70 | 2.55 |
| NP_000282.1    | PGK1    | phosphoglycerate kinase 1                                                          | 0.52 | 0.69 | 1.08 | 0.64 | 0.99 | 2.29 | 0.44 | 0.57 | 0.47 | 0.32 | 0.62 | 0.92 |
| NP_003290.1    | HSP90B1 | endoplasmin precursor                                                              | 0.72 | 1.95 | 1.08 | 0.52 | 1.89 |      | 0.77 | 2.12 | 0.68 | 0.29 | 1.07 | 0.66 |
| NP_000356.1    | TPI1    | triosephosphate isomerase isoform 1                                                | 0.60 | 1.23 | 1.07 | 0.77 | 1.88 | 1.97 | 0.56 | 1.02 | 0.57 | 0.35 | 1.26 | 0.80 |
| NP_998776.1    | SLC25A3 | phosphate carrier protein, mitochondrial isoform b precursor                       | 0.69 | 1.05 | 1.07 |      |      |      | 0.55 | 1.23 | 0.51 | 0.56 | 1.54 | 1.79 |
| NP_002406.1    | MIF     | macrophage migration inhibitory factor                                             | 0.56 | 0.78 | 1.07 |      |      |      | 0.72 | 0.66 |      |      |      |      |
| NP_036226.1    | PRDX5   | peroxiredoxin-5, mitochondrial isoform a precursor                                 | 0.46 | 0.61 | 1.07 | 0.57 | 0.78 | 2.44 |      |      |      |      |      |      |
| NP_003960.1    | UBE2M   | NEDD8-conjugating enzyme Ubc12                                                     | 0.81 | 1.39 | 1.07 |      |      |      | 0.94 | 1.23 |      |      |      |      |
| NP_001008491.1 | SEPT2   | septin-2                                                                           | 0.57 | 0.72 | 1.07 |      |      |      | 0.70 | 0.42 | 0.71 | 0.20 | 0.71 | 0.70 |
| NP_579899.1    | MYOF    | myoferlin isoform b                                                                | 0.36 | 0.40 | 1.06 |      |      |      |      |      |      | 0.51 | 1.10 | 3.08 |
| NP_006746.1    | TALDO1  | transaldolase                                                                      | 0.46 | 0.70 | 1.06 | 0.65 | 1.13 | 2.23 | 0.38 | 0.53 | 0.45 | 0.43 | 0.77 |      |
| NP_001013269.1 | SLC3A2  | 4F2 cell-surface antigen heavy chain isoform f                                     | 0.90 | 0.38 | 1.05 | 0.90 | 0.99 | 4.65 | 1.06 | 0.39 | 0.67 | 1.04 | 1.46 | 4.82 |
| NP_859048.1    | PRDX1   | peroxiredoxin-1                                                                    | 0.63 | 0.92 | 1.05 |      |      |      | 0.63 | 0.78 | 0.58 | 0.37 | 0.87 | 1.17 |
| NP_004068.2    | CS      | citrate synthase, mitochondrial precursor                                          | 0.59 | 1.31 | 1.04 | 0.17 | 0.86 |      | 0.63 | 1.27 | 0.60 | 0.39 | 1.27 | 1.30 |
| NP_001976.1    | ETFB    | electron transfer flavoprotein subunit beta isoform 1                              | 0.87 | 0.64 | 1.04 |      |      |      | 0.73 | 0.70 | 0.41 | 0.34 | 0.68 | 0.69 |
| NP_002941.1    | RPN1    | dolichyl-diphosphooligosaccharide--protein glycosyltransferase subunit 1 precursor | 0.69 | 1.13 | 1.04 |      |      |      | 0.89 | 1.39 | 1.18 | 0.37 | 0.85 | 1.08 |
| NP_003115.1    | SPR     | sepiapterin reductase                                                              | 0.89 | 1.01 | 1.03 |      |      |      |      |      |      |      |      |      |
| NP_000025.1    | ALDOA   | fructose-bisphosphate aldolase A isoform 1                                         | 0.40 | 0.66 | 1.03 | 0.46 | 0.91 | 1.58 | 0.38 | 0.60 | 0.51 | 0.22 | 0.63 | 0.97 |
| NP_005909.2    | MDH2    | malate dehydrogenase, mitochondrial precursor                                      | 0.75 | 0.69 | 1.02 | 0.57 | 0.41 | 1.18 | 0.79 | 0.79 | 0.55 | 0.42 | 0.75 | 1.17 |
| NP_005498.1    | CFL1    | cofilin-1                                                                          | 0.49 | 0.65 | 1.02 | 0.63 | 0.82 | 2.23 | 0.46 | 0.53 | 0.49 | 0.36 | 1.71 | 3.73 |
| NP_000134.2    | FH      | fumarate hydratase, mitochondrial precursor                                        | 0.66 | 0.72 | 1.00 |      |      |      | 0.73 | 0.84 | 0.51 | 0.32 | 0.62 | 0.93 |
| NP_277035.2    | HK1     | hexokinase-1 isoform HKI-td                                                        | 0.64 | 1.01 | 0.98 |      |      |      | 0.67 | 0.95 | 0.63 |      |      |      |
| NP_663723.1    | YWHAZ   | 14-3-3 protein zeta/delta                                                          | 0.44 | 0.38 | 0.98 | 0.47 | 0.49 | 1.65 | 0.44 | 0.34 | 0.52 | 0.30 | 0.47 | 1.36 |
| NP_005557.1    | LDHA    | L-lactate dehydrogenase A chain isoform 1                                          | 0.52 | 0.63 | 0.97 | 0.60 | 0.87 | 1.72 | 0.48 | 0.55 | 0.47 | 0.31 | 0.59 | 0.85 |
| NP_054817.2    | PRDX3   | thioredoxin-dependent peroxide reductase, mitochondrial isoform b                  | 0.69 | 0.69 | 0.97 | 0.58 | 0.70 | 1.62 | 0.82 | 0.81 | 0.60 | 0.46 | 0.86 |      |
| NP_005800.3    | PRDX2   | peroxiredoxin-2 isoform a                                                          | 0.66 | 0.91 | 0.97 | 0.92 | 1.33 | 2.06 | 0.76 | 0.90 | 0.65 | 0.38 | 0.89 | 0.92 |
| NP_005511.1    | HNRNPH1 | heterogeneous nuclear ribonucleoprotein H                                          | 0.60 | 1.09 | 0.97 |      |      |      | 0.88 | 1.01 | 0.78 |      |      |      |
| NP_149073.1    | SARNP   | SAP domain-containing ribonucleoprotein                                            | 0.70 | 1.06 | 0.96 |      |      |      |      |      |      |      |      |      |
| NP_008839.2    | RAC1    | ras-related C3 botulinum toxin substrate 1 isoform Rac1                            | 0.53 | 0.66 | 0.95 |      |      |      | 0.61 | 0.64 | 0.65 | 0.69 | 1.60 | 3.43 |
| NP_001121188.1 | ETFA    | electron transfer flavoprotein subunit alpha, mitochondrial isoform b              | 0.81 | 0.51 | 0.94 |      |      |      | 0.83 | 0.58 | 0.39 | 0.32 | 0.51 | 0.74 |
| NP_000010.1    | ACAT1   | acetyl-CoA acetyltransferase, mitochondrial precursor                              | 0.79 | 0.55 | 0.91 |      |      |      |      |      |      |      |      |      |
| NP_002853.2    | PYGB    | glycogen phosphorylase, brain form                                                 | 0.48 | 0.41 | 0.91 | 0.51 | 0.53 | 1.53 | 0.46 | 0.37 | 0.46 | 0.22 | 0.32 | 0.41 |
| NP_112243.1    | RAB1B   | ras-related protein Rab-1B                                                         | 0.43 | 0.51 | 0.90 | 0.63 | 1.00 | 2.16 | 0.42 | 0.51 | 0.39 | 0.11 | 0.71 | 6.91 |
| NP_003365.1    | VDAC1   | voltage-dependent anion-selective channel protein 1                                | 0.58 | 0.56 | 0.90 |      |      |      | 0.61 | 0.63 | 0.55 | 0.31 | 0.55 | 0.75 |
| NP_002558.1    | PEBP1   | phosphatidylethanolamine-binding protein 1 preproprotein                           | 0.37 | 0.96 | 0.90 |      |      |      | 0.33 | 0.61 | 0.49 |      |      |      |
| NP_002379.2    | MCM3    | DNA replication licensing factor MCM3                                              | 0.64 | 0.79 | 0.89 |      |      |      |      |      |      |      |      |      |
| NP_001760.1    | CD9     | CD9 antigen                                                                        | 0.45 | 0.32 | 0.89 |      |      |      | 0.53 | 0.33 |      | 0.26 | 0.52 |      |
| NP_057417.3    | SRRM2   | serine/arginine repetitive matrix protein 2                                        | 0.58 | 0.54 | 0.88 |      |      |      |      |      |      |      |      |      |
| NP_004902.1    | PDIA4   | protein disulfide-isomerase A4 precursor                                           | 0.57 | 0.75 | 0.88 |      |      |      |      |      |      |      |      |      |
| NP_057152.2    | FIS1    | mitochondrial fission 1 protein                                                    | 0.49 | 0.54 | 0.88 |      |      |      |      |      |      |      |      |      |
| NP_001001937.1 | ATP5A1  | ATP synthase subunit alpha, mitochondrial precursor                                | 0.68 | 0.79 | 0.88 |      |      |      | 0.70 | 0.89 | 0.48 | 0.41 | 0.83 | 0.81 |
| NP_056107.1    | ESYT1   | extended synaptotagmin-1 isoform 2                                                 | 0.61 | 0.99 | 0.87 |      |      |      |      |      |      | 0.22 | 0.97 |      |





|                |           |                                                                            |       |      |      |      |  |      |      |      |      |  |      |      |      |  |  |      |      |      |
|----------------|-----------|----------------------------------------------------------------------------|-------|------|------|------|--|------|------|------|------|--|------|------|------|--|--|------|------|------|
| NP_009109.3    | STRAP     | serine-threonine kinase receptor-associated protein                        | 0.81  | 1.76 |      |      |  |      |      |      |      |  |      |      |      |  |  |      |      |      |
| NP_001122386.1 | PCBP2     | poly(rC)-binding protein 2 isoform g                                       | 0.84  | 1.69 |      |      |  |      |      |      |      |  |      |      |      |  |  |      |      |      |
| NP_005040.2    | PWP2      | periodic tryptophan protein 2 homolog                                      | 2.04  | 1.69 |      |      |  |      |      |      |      |  |      |      |      |  |  |      |      |      |
| NP_995585.2    | PARD3B    | partitioning defective 3 homolog B isoform a                               | 0.99  | 1.65 |      |      |  |      |      |      |      |  |      |      |      |  |  |      |      |      |
| NP_942127.1    | ACLY      | ATP-citrate synthase isoform 2                                             | 0.97  | 1.64 | 1.02 | 2.33 |  | 0.79 | 1.56 |      |      |  | 0.56 | 1.32 |      |  |  |      |      |      |
| NP_079172.2    | ERMP1     | endoplasmic reticulum metalloproteinase 1                                  |       | 1.51 |      |      |  |      |      |      |      |  |      |      |      |  |  |      |      |      |
| NP_001015054.1 | MPG       | DNA-3-methyladenine glycosylase isoform c                                  | 0.93  | 1.51 |      |      |  |      |      |      |      |  |      |      |      |  |  |      |      |      |
| NP_002863.1    | RAC2      | ras-related C3 botulinum toxin substrate 2 precursor                       |       | 1.49 |      |      |  | 2.74 | 1.11 |      |      |  |      |      |      |  |  |      |      |      |
| NP_001139247.1 | FKBP5     | peptidyl-prolyl cis-trans isomerase FKBP5 isoform 1                        |       | 1.45 | 0.53 | 1.46 |  |      |      |      |      |  |      |      |      |  |  |      |      |      |
| NP_008924.1    | NPM3      | nucleoplasmin-3                                                            |       | 1.44 |      |      |  |      |      |      |      |  |      |      |      |  |  |      |      |      |
| NP_001019637.1 | SOD2      | superoxide dismutase [Mn], mitochondrial isoform B precursor               | 0.30  | 1.39 |      |      |  |      |      |      |      |  |      |      |      |  |  |      |      |      |
| NP_001157666.1 | PLIN3     | perilipin-3 isoform 3                                                      | 1.39  | 1.38 |      |      |  | 1.59 |      |      |      |  |      |      |      |  |  |      |      |      |
| NP_003082.1    | SNRPB     | small nuclear ribonucleoprotein-associated proteins B and B' isoform B     | 0.78  | 1.35 |      |      |  |      |      |      |      |  |      |      |      |  |  |      |      |      |
| NP_001186709.1 | PSMB2     | proteasome subunit beta type-2 isoform 3                                   | 0.94  | 1.34 |      |      |  |      | 0.94 | 1.38 | 1.12 |  |      |      |      |  |  |      |      |      |
| NP_001303.1    | CRIP2     | cysteine-rich protein 2                                                    | 0.17  | 1.33 |      |      |  |      | 0.19 | 1.17 |      |  | 0.04 | 2.09 |      |  |  |      |      |      |
| NP_001008800.1 | CCT3      | T-complex protein 1 subunit gamma isoform c                                | 1.21  | 1.31 |      |      |  |      |      |      |      |  | 0.79 | 1.12 |      |  |  |      |      |      |
| NP_000041.2    | ASS1      | argininosuccinate synthase                                                 | 0.43  | 1.29 | 0.59 | 1.51 |  | 0.37 | 1.41 |      |      |  |      |      |      |  |  |      |      |      |
| NP_005720.1    | PPIF      | peptidyl-prolyl cis-trans isomerase F, mitochondrial precursor             | 1.18  | 1.27 |      |      |  |      | 2.08 | 2.04 |      |  | 0.69 | 1.28 | 2.05 |  |  |      |      |      |
| XP_001717770.2 | LOC389217 | protein SET-like                                                           | 1.45  | 1.22 |      |      |  |      |      |      |      |  |      |      |      |  |  |      |      |      |
| NP_665906.1    | HMGA1     | high mobility group protein HMG-I/HMG-Y isoform a                          | 1.35  | 1.19 |      |      |  |      | 1.40 | 1.02 |      |  |      |      |      |  |  |      |      |      |
| NP_001152763.1 | MICAL1    | NEDD9-interacting protein with calponin homology and LIM domains isoform 2 | 1.02  | 1.19 |      |      |  |      |      |      |      |  |      |      |      |  |  |      |      |      |
| NP_002780.1    | PSMA4     | proteasome subunit alpha type-4 isoform 1                                  | 1.06  | 1.18 |      |      |  |      |      |      |      |  |      |      |      |  |  |      |      |      |
| NP_001186702.1 | PSMA5     | proteasome subunit alpha type-5 isoform 2                                  | 0.91  | 1.18 |      |      |  |      |      |      |      |  |      |      |      |  |  |      |      |      |
| NP_003818.2    | NAPA      | alpha-soluble NSF attachment protein                                       | 0.61  | 1.17 |      |      |  |      |      |      |      |  |      |      |      |  |  |      | 1.06 |      |
| NP_694546.1    | PSMC4     | 26S protease regulatory subunit 6B isoform 2                               | 0.86  | 1.17 |      |      |  |      |      |      |      |  |      |      |      |  |  |      |      |      |
| NP_065123.1    | EIF5A2    | 26S protease regulatory subunit 6B isoform 2                               | 0.91  | 1.16 |      |      |  |      | 0.91 | 1.07 |      |  | 0.36 | 0.79 |      |  |  |      |      |      |
| NP_115982.1    | HINT2     | histidine triad nucleotide-binding protein 2, mitochondrial precursor      | 1.10  | 1.15 |      |      |  |      |      |      |      |  |      |      |      |  |  |      |      |      |
| NP_003923.2    | ST13      | histidine triad nucleotide-binding protein 2, mitochondrial precursor      | 0.83  | 1.15 |      |      |  |      |      |      |      |  |      |      |      |  |  |      |      |      |
| NP_001005409.1 | SF3A1     | hsc70-interacting protein                                                  | 0.97  | 1.13 |      |      |  |      |      |      |      |  |      |      |      |  |  |      |      |      |
| NP_001129609.1 | RPL28     | splicing factor 3A subunit 1 isoform 2                                     | 1.16  | 1.12 |      |      |  |      |      |      |      |  |      |      |      |  |  |      |      |      |
| NP_038461.2    | TNPO2     | 60S ribosomal protein L28 isoform 5                                        | 0.97  | 1.10 |      |      |  |      |      |      |      |  |      |      |      |  |  |      |      |      |
| NP_112552.1    | HNRNPK    | transportin-2 isoform 2                                                    | 1.01  | 1.10 | 1.31 | 1.93 |  | 0.91 | 1.17 | 1.01 |      |  |      |      |      |  |  |      |      |      |
| NP_665699.1    | ZNF396    | heterogeneous nuclear ribonucleoprotein K isoform b                        | 0.76  | 1.06 |      |      |  |      |      |      |      |  |      |      |      |  |  |      |      |      |
| NP_001099040.1 | NUDT19    | zinc finger protein 396                                                    |       | 1.22 |      |      |  |      |      |      |      |  |      |      |      |  |  |      |      |      |
| NP_001037.1    | SLC12A2   | nucleoside diphosphate-linked moiety X motif 19, mitochondrial precursor   | 0.84  | 1.05 |      |      |  |      |      |      |      |  |      |      |      |  |  |      |      |      |
| NP_001018149.1 | NME2      | solute carrier family 12 member 2                                          | 0.83  | 1.02 |      |      |  |      |      |      |      |  | 1.17 | 2.97 | 2.65 |  |  |      |      |      |
| NP_004580.1    | SCO1      | nucleoside diphosphate kinase B isoform a                                  |       | 1.02 |      |      |  |      |      |      |      |  |      |      |      |  |  |      |      |      |
| NP_002285.1    | LAMP2     | protein SCO1 homolog, mitochondrial precursor                              |       | 1.02 |      |      |  |      | 0.71 | 0.93 |      |  |      |      |      |  |  |      |      |      |
| NP_003303.2    | TST       | lysosome-associated membrane glycoprotein 2 isoform A precursor            | 0.93  | 1.02 |      |      |  |      |      |      |      |  |      |      |      |  |  |      |      |      |
| NP_054737.1    | MRPS28    | thiosulfate sulfurtransferase                                              | 0.79  | 1.01 |      |      |  |      |      |      |      |  |      |      |      |  |  |      |      |      |
| NP_001344.2    | AKR1C1    | 28S ribosomal protein S28, mitochondrial                                   | 1.30  | 1.01 |      |      |  |      | 1.31 | 0.89 |      |  |      |      |      |  |  |      |      |      |
| NP_002344.2    | TACSTD2   | aldo-keto reductase family 1 member C1                                     | 0.29  | 1.01 | 0.69 | 3.47 |  |      |      |      |      |  |      |      |      |  |  |      |      |      |
| NP_002344.2    | TACSTD2   | tumor-associated calcium signal transducer 2 precursor                     | 72.65 | 1.00 |      |      |  |      |      |      |      |  |      |      |      |  |  | 0.13 | 0.05 | 0.44 |

|                |           |                                                                                       |  |      |      |  |      |      |      |      |      |       |      |      |
|----------------|-----------|---------------------------------------------------------------------------------------|--|------|------|--|------|------|------|------|------|-------|------|------|
| NP_066924.1    | CLDN1     | claudin-1                                                                             |  | 1.00 |      |  |      |      |      |      |      | 11.62 | 1.00 |      |
| NP_000985.1    | RPL32     | 60S ribosomal protein L32                                                             |  | 1.00 |      |  |      | 1.15 | 1.32 | 1.28 |      |       |      |      |
| NP_001155238.1 | AHCY      | adenosylhomocysteinase isoform 2                                                      |  | 1.42 | 0.96 |  |      |      |      |      |      |       |      |      |
| NP_004530.1    | NARS      | asparaginyl-tRNA synthetase, cytoplasmic                                              |  | 0.87 | 0.92 |  | 0.74 | 1.18 |      | 0.84 |      |       |      |      |
| NP_006073.2    | TUBA1B    | tubulin alpha-1B chain                                                                |  | 0.83 | 0.91 |  |      |      |      | 0.89 | 0.92 | 0.90  |      |      |
| NP_006397.1    | PRDX4     | peroxiredoxin-4                                                                       |  | 0.57 | 0.91 |  |      |      |      |      |      |       |      |      |
| NP_001131074.1 | MEMO1     | protein MEMO1 isoform 2                                                               |  | 0.77 | 0.91 |  |      |      |      |      |      |       |      |      |
| NP_001203.1    | C1QBP     | complement component 1 Q subcomponent-binding protein, mitochondrial precursor        |  | 0.99 | 0.90 |  |      |      |      | 1.00 | 1.04 | 0.71  |      |      |
| NP_001182356.1 | SRSF2     | serine/arginine-rich splicing factor 2                                                |  | 0.90 | 0.90 |  |      |      |      | 1.01 | 0.98 |       |      |      |
| NP_942584.1    | MTX1      | metaxin-1 isoform 2                                                                   |  |      | 0.89 |  |      |      |      |      |      |       |      |      |
| NP_002435.1    | MSN       | moesin                                                                                |  | 0.62 | 0.88 |  | 0.70 | 1.09 | 3.32 |      |      |       | 1.98 |      |
| NP_004823.1    | GSTO1     | glutathione S-transferase omega-1 isoform 1                                           |  | 1.12 | 0.87 |  | 1.19 | 1.87 | 4.98 |      |      |       |      |      |
| NP_066402.2    | HIST1H2BJ | histone H2B type 1-J                                                                  |  | 0.85 | 0.87 |  |      |      |      |      |      |       |      |      |
| NP_003042.3    | SLC16A1   | monocarboxylate transporter 1                                                         |  | 0.80 | 0.86 |  |      |      |      |      |      | 0.18  | 0.28 | 0.47 |
| NP_001136407.1 | MXD3      | max dimerization protein 3 isoform b                                                  |  | 0.58 | 0.85 |  |      |      |      |      |      |       |      |      |
| NP_004883.2    | SEC22B    | vesicle-trafficking protein SEC22b                                                    |  | 0.49 | 0.82 |  |      |      |      | 0.57 | 0.95 |       |      |      |
| NP_001655.1    | RHOA      | transforming protein RhoA precursor                                                   |  | 0.70 | 0.80 |  |      |      |      | 0.80 | 0.69 | 0.96  | 0.46 | 1.11 |
| NP_076425.1    | MRPS34    | 28S ribosomal protein S34, mitochondrial                                              |  | 0.99 | 0.79 |  |      |      |      |      |      |       |      |      |
| NP_000311.2    | QDPR      | dihydropteridine reductase                                                            |  | 1.00 | 0.78 |  |      |      |      |      |      |       |      |      |
| NP_001077007.1 | POTEE     | POTE ankyrin domain family member E                                                   |  | 0.75 | 0.77 |  | 0.25 | 1.78 |      | 0.60 | 0.70 | 0.81  |      |      |
| NP_919223.1    | HNRNPA3   | heterogeneous nuclear ribonucleoprotein A3                                            |  | 0.80 | 0.77 |  |      |      |      | 0.90 | 0.85 |       |      |      |
| NP_005165.1    | ATP5C1    | ATP synthase subunit gamma, mitochondrial isoform H (heart) precursor                 |  | 0.61 | 0.77 |  |      |      |      | 0.77 | 0.78 |       | 0.27 | 0.51 |
| NP_660298.2    | MRPL10    | 39S ribosomal protein L10, mitochondrial isoform a precursor                          |  | 0.97 | 0.74 |  |      |      |      |      |      |       |      |      |
| NP_001020131.1 | ARPC4     | actin-related protein 2/3 complex subunit 4 isoform b                                 |  | 0.83 | 0.74 |  |      |      |      | 0.92 | 0.74 |       |      |      |
| NP_006383.2    | NOP56     | nucleolar protein 56                                                                  |  | 0.69 | 0.74 |  |      |      |      |      |      |       |      |      |
| NP_057134.1    | MRPL11    | 39S ribosomal protein L11, mitochondrial isoform a                                    |  | 0.67 | 0.72 |  |      |      |      |      |      |       |      |      |
| NP_003514.2    | HIST1H2BE | histone H2B type 1-C/E/F/G/I                                                          |  | 0.69 | 0.71 |  |      |      |      |      |      |       |      |      |
| NP_003119.2    | SPTBN1    | spectrin beta chain, brain 1 isoform 1                                                |  | 0.57 | 0.70 |  |      |      |      |      |      |       |      |      |
| NP_005712.1    | ACTR3     | actin-related protein 3                                                               |  | 0.55 | 0.68 |  |      |      |      |      |      |       |      |      |
| NP_004484.1    | HSD17B10  | 3-hydroxyacyl-CoA dehydrogenase type-2 isoform 1                                      |  | 0.67 | 0.68 |  |      |      |      |      |      |       |      |      |
| NP_004993.1    | NDUFA9    | NADH dehydrogenase [ubiquinone] 1 alpha subcomplex subunit 9, mitochondrial precursor |  | 0.56 | 0.67 |  |      |      |      |      |      |       |      |      |
| NP_000265.1    | OAT       | ornithine aminotransferase, mitochondrial isoform 1 precursor                         |  | 0.91 | 0.67 |  |      |      |      |      |      |       |      |      |
| NP_001075109.1 | PRKDC     | DNA-dependent protein kinase catalytic subunit isoform 2                              |  | 0.63 | 0.66 |  |      |      |      |      |      |       |      |      |
| NP_008939.1    | RTN4      | reticulon-4 isoform C                                                                 |  | 0.56 | 0.65 |  |      |      |      |      |      |       |      |      |
| NP_001377.1    | DPYSL2    | dihydropyrimidinase-related protein 2 isoform 2                                       |  | 0.24 | 0.65 |  | 0.17 | 0.68 | 0.48 | 0.05 | 0.08 |       |      |      |
| NP_000512.1    | HEXB      | beta-hexosaminidase subunit beta preproprotein                                        |  | 0.67 | 0.65 |  |      |      |      |      |      |       |      |      |
| NP_006631.2    | SEPT9     | septin-9 isoform c                                                                    |  | 0.64 | 0.63 |  |      |      |      | 0.70 | 0.70 |       |      |      |
| NP_002991.2    | SDHB      | succinate dehydrogenase [ubiquinone] iron-sulfur subunit, mitochondrial precursor     |  | 0.77 | 0.62 |  |      |      |      |      |      |       |      |      |
| NP_613075.1    | H2AFY     | core histone macro-H2A.1 isoform 1                                                    |  |      | 0.60 |  |      |      |      | 0.74 | 0.66 | 0.65  |      |      |
| NP_001123477.1 | ACTN1     | alpha-actinin-1 isoform c                                                             |  | 0.68 | 0.60 |  | 0.78 | 0.84 |      | 0.69 | 0.54 | 0.87  |      |      |
| NP_066952.1    | PPA1      | inorganic pyrophosphatase                                                             |  | 0.64 | 0.59 |  |      |      |      |      |      |       |      |      |
| NP_005110.2    | THRAP3    | thyroid hormone receptor-associated protein 3                                         |  | 1.63 | 0.59 |  |      |      |      |      |      |       |      |      |
| NP_006817.1    | YWHAQ     | 14-3-3 protein theta                                                                  |  | 0.70 | 0.59 |  |      |      |      | 0.90 | 0.97 |       |      |      |

|                |              |                                                                           |      |      |      |      |      |      |      |      |
|----------------|--------------|---------------------------------------------------------------------------|------|------|------|------|------|------|------|------|
| NP_001137152.1 | GSTK1        | glutathione S-transferase kappa 1 isoform c                               | 0.42 | 0.58 |      |      |      |      |      |      |
| NP_057376.2    | TRAP1        | heat shock protein 75 kDa, mitochondrial precursor                        | 0.54 | 0.57 |      |      |      |      |      |      |
| NP_002203.1    | EIF6         | eukaryotic translation initiation factor 6 isoform a                      | 1.21 | 0.54 |      |      |      |      |      |      |
| NP_658985.2    | APOA1BP      | apolipoprotein A-I-binding protein precursor                              |      | 0.54 |      |      |      |      |      |      |
| NP_055416.2    | EHD2         | EH domain-containing protein 2                                            | 0.15 | 0.53 |      |      |      |      |      |      |
| NP_001654.1    | ARF6         | ADP-ribosylation factor 6                                                 | 0.60 | 0.52 |      |      |      |      |      |      |
| NP_001670.1    | ATP1B3       | sodium/potassium-transporting ATPase subunit beta-3                       | 0.44 | 0.52 |      |      |      | 0.36 | 1.14 | 1.99 |
| NP_005318.3    | HADH         | hydroxyacyl-coenzyme A dehydrogenase, mitochondrial isoform 2 precursor   |      | 0.50 |      |      |      |      |      |      |
| XP_001718723.3 | LOC100131514 | mucin-3A-like                                                             | 0.70 | 0.45 |      |      |      |      |      |      |
| NP_005882.2    | ACAT2        | acetyl-CoA acetyltransferase, cytosolic                                   | 0.32 | 0.45 |      |      |      |      |      |      |
| NP_001129612.1 | CMPK1        | UMP-CMP kinase isoform b                                                  | 0.39 | 0.45 |      |      |      |      |      |      |
| NP_059980.2    | TMED9        | transmembrane emp24 domain-containing protein 9 precursor                 |      | 0.44 |      |      |      | 0.04 | 0.04 |      |
| NP_001853.2    | COX5B        | cytochrome c oxidase subunit 5B, mitochondrial precursor                  | 0.42 | 0.44 |      |      |      | 0.18 | 0.45 |      |
| NP_036364.2    | PTRF         | polymerase I and transcript release factor                                | 0.50 | 0.43 | 0.50 | 0.42 |      |      |      |      |
| NP_003147.2    | STIM1        | stromal interaction molecule 1 precursor                                  | 0.51 | 0.43 |      |      |      |      |      |      |
| NP_149131.1    | CALD1        | caldesmon isoform 5                                                       | 0.22 | 0.42 |      |      |      |      |      |      |
| NP_001161803.1 | NDUFB4       | NADH dehydrogenase [ubiquinone] 1 beta subcomplex subunit 4 isoform 2     | 0.61 | 0.41 | 0.65 | 1.00 |      |      |      |      |
| NP_006786.2    | EHD1         | EH domain-containing protein 1                                            | 0.56 | 0.39 |      |      |      |      |      |      |
| NP_203693.3    | MYO1C        | myosin-Ic isoform c                                                       | 0.31 | 0.37 |      |      |      | 0.05 | 0.96 | 0.39 |
| NP_001171500.1 | ECI1         | enoyl-CoA delta isomerase 1, mitochondrial isoform 2 precursor            | 0.35 | 0.36 | 0.33 | 0.17 |      |      |      |      |
| NP_001005189.1 | OR6Y1        | olfactory receptor 6Y1                                                    | 0.80 | 0.35 |      |      |      |      |      |      |
| NP_958786.1    | PLEC         | plectin isoform 1a                                                        | 0.56 | 0.35 |      |      |      |      |      |      |
| NP_644670.1    | EHD4         | EH domain-containing protein 4                                            | 0.78 | 0.33 |      |      |      |      |      |      |
| NP_001350.1    | DECR1        | 2,4-dienoyl-CoA reductase, mitochondrial precursor                        | 0.21 | 0.29 | 0.40 | 0.35 |      | 0.03 | 0.03 | 0.10 |
| NP_060310.1    | MRPL16       | 39S ribosomal protein L16, mitochondrial precursor                        | 0.75 | 0.27 |      |      |      |      |      |      |
| NP_006654.2    | PPP1R13L     | relA-associated inhibitor                                                 | 0.77 | 0.23 |      |      |      |      |      |      |
| NP_998816.1    | SLC25A24     | calcium-binding mitochondrial carrier protein SCaMC-1 isoform 2           | 0.44 | 0.19 |      |      |      |      |      |      |
| NP_004990.3    | MYO6         | myosin-VI                                                                 | 0.27 | 0.18 |      |      |      |      |      |      |
| NP_005313.1    | HIST1H1B     | histone H1.5                                                              | 0.15 | 0.16 | 0.21 | 0.24 | 0.01 |      |      |      |
| NP_000427.1    | OXCT1        | succinyl-CoA:3-ketoacid-coenzyme A transferase 1, mitochondrial precursor | 0.15 | 0.15 | 0.43 |      |      |      |      |      |
| NP_002696.3    | PPL          | periplakin                                                                | 0.15 | 0.14 |      |      | 0.17 |      |      |      |
| NP_002274.1    | KRT85        | keratin, type II cuticular Hb5                                            | 0.16 | 0.12 |      |      |      | 0.02 | 0.02 |      |
| NP_001165806.1 | PLS3         | plastin-3 isoform 2                                                       |      | 0.10 | 0.46 | 0.40 | 9.99 |      |      |      |
| NP_006077.2    | TUBB3        | tubulin beta-3 chain isoform 1                                            | 0.06 | 0.07 | 0.51 | 0.11 | 5.11 |      | 0.25 | 0.30 |
| NP_001009186.1 | CCT6A        | T-complex protein 1 subunit zeta isoform b                                | 0.04 | 0.04 | 0.94 | 1.69 |      |      |      |      |
| NP_005545.1    | KRT6A        | keratin, type II cytoskeletal 6A                                          | 0.10 | 0.03 |      |      | 0.05 | 0.02 | 0.03 | 0.04 |
| NP_001447.2    | FLNA         | filamin-A isoform 1                                                       | 0.03 | 0.03 | 0.01 | 0.01 |      | 0.02 | 0.02 | 0.06 |
| NP_000412.3    | KRT10        | keratin, type I cytoskeletal 10                                           | 0.03 | 0.03 |      |      |      | 0.02 | 0.02 | 1.91 |
| NP_112598.2    | EPPK1        | epiplakin                                                                 | 0.03 | 0.03 |      |      |      |      |      |      |
| NP_005548.2    | KRT16        | keratin, type I cytoskeletal 16                                           | 0.02 | 0.02 |      |      | 0.02 | 0.04 |      |      |
| NP_003279.2    | TPD52L2      | tumor protein D54 isoform e                                               | 0.02 | 0.02 |      |      |      |      |      |      |
| NP_056138.1    | UFL1         | E3 UFM1-protein ligase 1                                                  |      | 0.01 |      |      |      |      |      |      |

|                |          |                                                                                                         |      |      |      |       |       |       |      |        |      |      |      |      |
|----------------|----------|---------------------------------------------------------------------------------------------------------|------|------|------|-------|-------|-------|------|--------|------|------|------|------|
| NP_000217.2    | KRT9     | keratin, type I cytoskeletal 9                                                                          | 0.01 | 0.01 | 0.02 | 0.02  | 0.48  | 0.01  | 0.01 | 0.03   | 0.03 | 2.46 |      |      |
| NP_787028.1    | KRT79    | keratin, type II cytoskeletal 79                                                                        | 0.01 | 0.01 |      |       |       |       |      |        |      |      |      |      |
| NP_001739.2    | CAPN2    | calpain-2 catalytic subunit isoform 1                                                                   | 1.32 |      | 0.70 | 0.71  | 1.33  | 0.94  | 0.51 |        |      |      |      |      |
| NP_002005.1    | FKBP4    | peptidyl-prolyl cis-trans isomerase FKBP4                                                               | 1.23 |      | 1.54 | 2.37  | 4.54  |       |      |        |      |      |      |      |
| NP_001075.1    | PLOD3    | procollagen-lysine,2-oxoglutarate 5-dioxygenase 3 precursor                                             | 0.64 |      |      |       |       |       |      |        |      |      |      |      |
| NP_001106968.1 | SEPT9    | septin-9 isoform f                                                                                      |      |      |      |       |       |       |      | 0.14   | 0.14 |      |      |      |
| NP_060713.1    | SEPT11   | septin-11                                                                                               |      |      |      |       |       |       |      | 0.05   | 0.05 | 0.18 |      |      |
| NP_942135.1    | ACACA    | acetyl-CoA carboxylase 1 isoform 4                                                                      |      |      | 0.91 | 2.60  | 50.48 |       |      |        |      |      |      |      |
| NP_001017992.1 | ACTBL2   | beta-actin-like protein 2                                                                               |      |      | 0.81 | 1.20  |       |       |      |        |      |      |      |      |
| NP_001093.1    | ACTN1    | alpha-actinin-1 isoform b                                                                               |      |      |      |       |       |       |      | 0.43   | 1.20 | 5.19 |      |      |
| NP_001095.1    | ACTN3    | alpha-actinin-3                                                                                         |      |      | 0.85 | 0.86  |       |       |      |        |      |      |      |      |
| NP_003650.1    | AGPS     | alkyldihydroxyacetonephosphate synthase, peroxisomal precursor                                          |      |      |      |       |       |       |      |        |      | 1.54 |      |      |
| NP_000678.1    | AHCY     | adenosylhomocysteinase isoform 1                                                                        |      |      | 1.46 | 2.11  |       |       |      |        |      |      |      |      |
| NP_000467.1    | AK1      | adenylate kinase isoenzyme 1                                                                            |      |      | 0.73 | 0.76  | 3.04  | 0.74  | 0.46 |        |      |      |      |      |
| NP_001189343.1 | AKR1A1   | alcohol dehydrogenase [NADP+]                                                                           |      |      | 0.62 | 0.89  |       |       |      |        |      |      |      |      |
| NP_000468.1    | ALB      | serum albumin preproprotein                                                                             |      |      |      |       |       |       | 0.02 | 0.02   | 0.80 | 0.02 | 0.02 | 1.30 |
| NP_061877.1    | ANKIB1   | ankyrin repeat and IBR domain-containing protein 1                                                      |      |      |      |       |       |       | 1.25 | 1.45   |      |      |      |      |
| NP_653299.3    | ANKRD35  | ankyrin repeat domain-containing protein 35                                                             |      |      |      |       |       |       | 1.31 | 1.38   |      |      |      |      |
| NP_006392.1    | ANP32B   | acidic leucine-rich nuclear phosphoprotein 32 family member B                                           |      |      | 1.87 | 2.70  | 4.04  | 1.27  | 1.76 | 1.45   |      |      |      |      |
| NP_001621.2    | ANXA8L2  | annexin A8-like protein 2                                                                               |      |      | 6.06 | 4.11  |       | 69.58 | 1.00 | 121.41 |      |      |      |      |
| NP_036437.1    | AP2A2    | AP-2 complex subunit alpha-2 isoform 2                                                                  |      |      |      |       |       | 0.70  | 1.74 |        | 0.88 | 1.96 |      |      |
| NP_001651.1    | ARF4     | ADP-ribosylation factor 4                                                                               |      |      |      |       |       | 1.05  | 1.85 |        |      |      |      |      |
| NP_055976.1    | ARL6IP1  | ADP-ribosylation factor-like protein 6-interacting protein 1                                            |      |      |      |       |       |       | 0.49 | 1.43   |      |      |      |      |
| NP_005710.1    | ARPC3    | actin-related protein 2/3 complex subunit 3                                                             |      |      | 0.92 | 1.00  | 4.54  | 0.46  | 0.43 |        |      |      |      |      |
| NP_005709.1    | ARPC4    | actin-related protein 2/3 complex subunit 4 isoform a                                                   |      |      |      |       |       |       |      |        | 0.42 | 1.12 | 0.99 |      |
| NP_001158228.1 | ASPH     | aspartyl/asparaginyl beta-hydroxylase isoform I                                                         |      |      |      |       |       | 0.82  | 0.81 |        |      |      |      |      |
| NP_000692.2    | ATP1A1   | sodium/potassium-transporting ATPase subunit alpha-1 isoform a                                          |      |      |      |       |       |       |      |        | 0.37 | 0.84 | 1.48 |      |
| NP_001668.1    | ATP1B1   | sodium/potassium-transporting ATPase subunit beta-1 sarcoplasmic/endoplasmic reticulum calcium ATPase 2 |      |      |      |       |       |       |      |        | 0.23 | 0.15 |      |      |
| NP_001129237.1 | ATP2A2   | isoform 3                                                                                               |      |      |      |       |       | 0.03  | 2.99 |        |      |      |      |      |
| NP_001673.2    | ATP2B1   | plasma membrane calcium-transporting ATPase 1 isoform 1b                                                |      |      |      |       |       |       |      |        | 0.47 | 2.21 | 3.82 |      |
| NP_001001396.1 | ATP2B4   | plasma membrane calcium-transporting ATPase 4 isoform 4a                                                |      |      |      |       | 2.37  |       |      |        |      |      |      |      |
| NP_001679.2    | ATP5F1   | ATP synthase subunit b, mitochondrial precursor                                                         |      |      |      |       |       | 0.64  | 0.87 | 0.48   | 0.43 | 0.82 |      |      |
| NP_932071.1    | BID      | BH3-interacting domain death agonist isoform 3                                                          |      |      | 8.73 | 20.18 |       |       |      |        |      |      |      |      |
| NP_000704.1    | BLVRB    | flavin reductase                                                                                        |      |      | 0.57 | 1.02  | 1.74  | 0.41  | 0.69 |        |      |      |      |      |
| NP_940991.1    | BSG      | basigin isoform 2 precursor                                                                             |      |      |      |       |       |       |      |        | 0.59 | 1.01 | 3.50 |      |
| NP_937798.3    | C21orf33 | ES1 protein homolog, mitochondrial isoform 1b precursor                                                 |      |      |      |       |       |       |      | 0.58   |      |      |      |      |
| NP_057731.1    | C8orf55  | mesenchymal stem cell protein DSCD75 precursor                                                          |      |      |      |       |       | 0.37  | 0.66 |        |      |      |      |      |
| NP_001007215.1 | CACYBP   | calcyclin-binding protein isoform 2                                                                     |      |      | 0.90 | 1.74  |       |       |      |        |      |      |      |      |
| NP_542157.1    | CAPS     | calcyphosin isoform b                                                                                   |      |      |      |       |       |       | 1.00 |        |      |      |      |      |

|                |         |                                                                                         |      |      |      |      |      |      |       |       |       |  |
|----------------|---------|-----------------------------------------------------------------------------------------|------|------|------|------|------|------|-------|-------|-------|--|
| NP_001119527.1 | CASK    | peripheral plasma membrane protein CASK isoform 3                                       |      |      |      |      |      |      | 0.01  | 0.01  |       |  |
| NP_057671.2    | CBX3    | chromobox protein homolog 3                                                             |      |      |      | 0.78 | 1.05 |      |       |       |       |  |
| NP_001120794.1 | CBX5    | chromobox protein homolog 5                                                             |      |      |      | 0.64 | 1.47 |      |       |       |       |  |
| NP_005989.3    | CCT3    | T-complex protein 1 subunit gamma isoform a                                             | 1.21 | 1.68 | 5.08 |      |      |      |       |       |       |  |
| NP_001009570.1 | CCT7    | T-complex protein 1 subunit eta isoform b                                               |      |      |      |      |      |      | 0.55  | 1.19  |       |  |
| NP_001271.1    | CIRBP   | cold-inducible RNA-binding protein                                                      |      |      |      | 0.75 | 0.84 |      |       |       |       |  |
| NP_039234.1    | CLIC4   | chloride intracellular channel protein 4                                                | 0.75 | 1.21 | 3.57 | 0.53 | 0.70 |      | 0.10  | 1.68  | 1.88  |  |
| NP_620164.1    | CMBL    | carboxymethylenebutenolidase homolog                                                    | 1.02 | 4.54 |      |      |      |      |       |       |       |  |
| NP_057392.1    | CMPK1   | UMP-CMP kinase isoform a                                                                | 0.73 | 1.13 | 1.97 | 0.54 | 0.70 |      |       |       |       |  |
| NP_001120668.1 | CNBP    | cellular nucleic acid-binding protein isoform 6                                         |      |      |      | 1.16 | 1.28 |      |       |       |       |  |
| NP_055070.1    | CNPY2   | protein canopy homolog 2 isoform 1 precursor                                            |      |      |      | 0.79 | 1.94 |      | 0.17  | 0.35  |       |  |
| NP_009294.1    | COMT    | catechol O-methyltransferase isoform S-COMT                                             | 0.06 | 0.06 | 0.12 | 0.64 | 0.05 |      |       |       |       |  |
| NP_955476.1    | COPE    | coatomer subunit epsilon isoform c                                                      |      |      |      | 0.88 | 1.13 |      |       |       |       |  |
| NP_937832.1    | COPS8   | COP9 signalosome complex subunit 8 isoform 2                                            |      |      |      | 0.71 | 1.00 |      |       |       |       |  |
| NP_001018080.1 | CORO1B  | coronin-1B                                                                              |      |      |      |      |      |      | 0.44  | 1.15  | 15.47 |  |
| NP_055140.1    | CORO1C  | coronin-1C isoform 1                                                                    |      |      |      |      |      |      | 0.56  | 3.40  | 30.28 |  |
| NP_066972.1    | COTL1   | coactosin-like protein                                                                  |      |      |      | 0.59 | 0.50 | 0.66 |       |       |       |  |
| NP_001185792.1 | CPNE1   | copine-1 isoform c                                                                      | 1.30 | 0.87 | 2.83 |      |      |      |       |       |       |  |
| NP_001180499.1 | CSRP1   | cysteine and glycine-rich protein 1 isoform 3                                           |      |      |      | 0.13 | 0.15 |      | 0.07  | 0.07  |       |  |
| NP_001899.1    | CTSB    | cathepsin B preproprotein                                                               |      |      |      |      | 0.11 |      |       |       |       |  |
| NP_001014837.1 | CUTA    | protein CutA isoform 2                                                                  | 0.02 | 1.21 | 0.09 |      |      |      |       |       |       |  |
| NP_061820.1    | CYCS    | cytochrome c                                                                            |      |      |      | 0.77 | 1.14 |      |       |       |       |  |
| NP_004386.2    | DBN1    | drebrin isoform a                                                                       |      |      |      | 1.27 | 1.78 |      | 0.08  | 2.43  | 8.42  |  |
| NP_001128513.1 | DCTN1   | dynactin subunit 1 isoform 4                                                            | 2.23 | 1.49 |      |      |      |      |       |       |       |  |
| NP_005207.2    | DDOST   | dolichyl-diphosphooligosaccharide--protein glycosyltransferase 48 kDa subunit precursor |      |      |      |      |      |      | 0.06  | 0.06  | 0.13  |  |
| NP_006377.2    | DDX17   | probable ATP-dependent RNA helicase DDX17 isoform 1                                     |      |      |      |      |      |      | 1.55  | 1.91  |       |  |
| NP_076950.1    | DDX50   | ATP-dependent RNA helicase DDX50                                                        |      |      |      | 1.14 | 2.65 |      |       |       |       |  |
| NP_001073280.1 | DIAPH1  | protein diaphanous homolog 1 isoform 2                                                  | 0.80 | 0.52 | 4.88 |      |      |      |       |       |       |  |
| NP_057390.1    | DNAJB11 | dnaJ homolog subfamily B member 11 precursor                                            |      |      |      |      |      |      | 0.05  | 0.05  |       |  |
| NP_056005.1    | DNAJC9  | dnaJ homolog subfamily C member 9                                                       |      |      |      |      |      |      | 2.06  | 2.24  | 7.08  |  |
| NP_569710.2    | DPP3    | dipeptidyl peptidase 3                                                                  | 0.63 | 1.04 | 2.41 |      |      |      |       |       |       |  |
| NP_001008844.1 | DSP     | desmoplakin isoform II                                                                  |      |      |      |      |      |      | 0.45  | 0.47  |       |  |
| NP_001011546.1 | DSTN    | destrin isoform b                                                                       |      |      |      | 0.37 | 0.55 |      | 0.06  | 1.34  |       |  |
| NP_543010.3    | DTD1    | D-tyrosyl-tRNA(Tyr) deacylase 1                                                         |      |      |      | 1.12 | 1.17 |      |       |       |       |  |
| NP_001158503.1 | DTYMK   | thymidylate kinase isoform 2                                                            |      |      |      | 0.62 | 0.67 |      |       |       |       |  |
| NP_653166.2    | DUOXA1  | dual oxidase maturation factor 1                                                        | 6.97 | 1.00 |      |      |      |      |       |       |       |  |
| NP_001020420.1 | DUT     | deoxyuridine 5'-triphosphate nucleotidohydrolase, mitochondrial isoform 3               | 1.21 | 1.59 | 1.96 | 0.93 | 0.96 |      |       |       |       |  |
| NP_001369.1    | DYNC1I2 | cytoplasmic dynein 1 intermediate chain 2                                               | 1.07 | 1.32 |      |      |      |      |       |       |       |  |
| NP_006570.1    | EBP     | 3-beta-hydroxysteroid-Delta(8), Delta(7)-isomerase                                      |      |      |      |      |      |      | 0.28  | 0.34  |       |  |
| NP_694880.1    | EDF1    | endothelial differentiation-related factor 1 isoform beta                               |      |      |      | 1.41 | 2.44 |      |       |       |       |  |
| NP_003557.2    | EEA1    | early endosome antigen 1                                                                | 0.35 |      |      |      |      |      |       |       |       |  |
| NP_001123528.1 | EEF1D   | elongation factor 1-delta isoform 4                                                     | 0.89 | 1.92 |      | 0.89 | 0.60 |      |       |       |       |  |
| NP_958440.1    | EGFR    | epidermal growth factor receptor isoform c precursor                                    |      |      |      |      |      |      | 13.49 | 18.48 |       |  |
| NP_001191439.1 | EIF4A1  | eukaryotic initiation factor 4A-I isoform 2                                             |      |      |      | 1.11 | 1.63 |      |       |       |       |  |
| NP_852131.1    | EIF6    | eukaryotic translation initiation factor 6 isoform c                                    |      |      |      | 1.26 | 0.98 |      |       |       |       |  |





|                |              |                                                                                      |      |       |       |      |      |      |      |       |       |      |
|----------------|--------------|--------------------------------------------------------------------------------------|------|-------|-------|------|------|------|------|-------|-------|------|
| XP_003119966.1 | LOC100507801 | 60S ribosomal protein L25-like                                                       |      |       |       |      | 0.66 | 0.98 |      |       |       |      |
| XP_003119503.1 | LOC100508006 | aldo-keto reductase family 1 member C2-like isoform 3                                |      |       |       |      | 0.18 | 0.99 |      | 0.07  | 1.16  | 0.03 |
| XP_003119502.1 | LOC100508006 | aldo-keto reductase family 1 member C2-like isoform 2                                | 0.06 | 0.93  |       |      |      |      |      |       |       |      |
| XP_003120348.1 | LOC100508181 | ran-specific GTPase-activating protein-like                                          | 1.16 | 1.48  | 3.60  | 1.04 | 1.02 | 1.03 | 0.61 | 0.94  |       |      |
| XP_003120000.1 | LOC100508643 | ras-related protein Rap-1b-like protein-like                                         |      |       |       | 0.70 | 1.06 | 0.66 |      |       |       |      |
| XP_001717228.2 | LOC729595    | high mobility group protein B3-like                                                  |      |       |       | 1.09 | 0.47 | 0.16 |      |       |       |      |
| XP_001129414.1 | LOC731751    | DNA-dependent protein kinase catalytic subunit-like                                  | 1.13 | 1.30  |       | 0.50 | 0.52 | 0.43 |      |       |       |      |
| NP_001131025.1 | LRRFIP1      | leucine-rich repeat flightless-interacting protein 1 isoform 5                       |      | 1.30  | 0.00  |      |      |      |      |       |       |      |
| NP_689557.1    | LSM12        | protein LSM12 homolog                                                                |      |       |       | 1.11 | 2.15 |      |      |       |       |      |
| NP_000886.1    | LTA4H        | leukotriene A-4 hydrolase                                                            | 1.03 | 1.56  | 2.98  |      |      |      |      |       |       |      |
| NP_006321.1    | LYPLA1       | acyl-protein thioesterase 1                                                          | 0.58 | 0.71  | 2.01  | 0.37 | 0.34 |      |      |       |       |      |
| NP_054752.3    | METTL7A      | methyltransferase-like protein 7A precursor                                          |      |       |       | 0.16 | 1.07 |      | 0.05 | 0.82  |       |      |
| NP_054797.2    | MRPL13       | ras-related protein Rap-1A precursor                                                 |      |       |       |      |      |      | 0.58 | 0.78  |       |      |
| NP_071344.1    | MRPL17       | 39S ribosomal protein L17, mitochondrial precursor                                   |      |       |       | 0.86 | 1.01 |      |      |       |       |      |
| NP_000245.2    | MTR          | methionine synthase                                                                  | 1.09 | 2.83  | 48.82 |      |      |      |      |       |       |      |
| NP_057323.3    | MYO15A       | myosin-XV                                                                            |      |       |       |      |      |      | 0.54 | 0.90  | 1.61  |      |
| NP_036355.2    | MYO1B        | myosin-Ib isoform 2                                                                  |      |       |       |      |      |      | 1.70 | 1.58  | 7.86  |      |
| NP_005737.1    | NAMPT        | nicotinamide phosphoribosyltransferase precursor                                     | 5.91 | 25.48 |       |      |      |      |      |       |       |      |
| NP_660202.3    | NAPRT1       | nicotinate phosphoribosyltransferase                                                 | 0.17 |       |       |      |      |      |      |       |       |      |
| NP_001139749.1 | NCEH1        | neutral cholesterol ester hydrolase 1 isoform c                                      |      |       |       |      |      |      | 0.45 | 1.56  | 5.83  |      |
| NP_004995.1    | NDUFB8       | NADH dehydrogenase [ubiquinone] 1 beta subcomplex subunit 8, mitochondrial precursor |      |       |       | 0.75 | 0.67 |      |      |       |       |      |
| NP_001186911.1 | NDUFS1       | NADH-ubiquinone oxidoreductase 75 kDa subunit, mitochondrial isoform 3               |      |       |       |      |      |      | 0.09 | 0.74  |       |      |
| NP_004542.1    | NDUFS3       | NADH dehydrogenase [ubiquinone] iron-sulfur protein 3, mitochondrial precursor       |      |       |       | 0.75 | 0.70 |      |      |       |       |      |
| NP_077718.3    | NDUFS7       | NADH dehydrogenase [ubiquinone] iron-sulfur protein 7, mitochondrial precursor       |      |       |       | 0.86 | 0.92 |      |      |       |       |      |
| NP_066552.2    | NDUFV2       | NADH dehydrogenase [ubiquinone] flavoprotein 2, mitochondrial precursor              |      |       |       |      |      |      | 0.42 | 0.98  |       |      |
| NP_060308.1    | NHP2         | H/ACA ribonucleoprotein complex subunit 2 isoform a                                  |      |       |       | 1.19 | 1.30 |      |      |       |       |      |
| NP_000260.1    | NME1         | nucleoside diphosphate kinase A isoform b                                            |      |       |       | 0.73 | 0.99 | 0.80 |      |       |       |      |
| NP_001018146.1 | NME1-NME2    | NME1-NME2 protein                                                                    | 1.06 | 1.86  | 3.25  | 0.80 | 0.94 | 0.92 | 0.59 | 1.10  |       |      |
| NP_006160.1    | NNMT         | nicotinamide N-methyltransferase                                                     | 1.64 | 5.77  | 0.49  |      |      |      |      |       |       |      |
| NP_001032827.1 | NPM1         | nucleophosmin isoform 3                                                              | 1.56 | 1.37  | 2.70  |      |      |      |      |       |       |      |
| NP_071355.1    | NSUN3        | putative methyltransferase NSUN3                                                     | 0.93 | 1.64  |       |      |      |      |      |       |       |      |
| NP_002517.1    | NT5E         | 5'-nucleotidase isoform 1 preproprotein                                              |      |       |       |      |      |      | 5.23 | 19.46 | 11.56 |      |
| NP_001165376.1 | NUDT16       | U8 snoRNA-decapping enzyme isoform 3                                                 | 1.48 | 0.66  | 42.17 |      |      |      |      |       |       |      |
| NP_001003941.1 | OGDH         | 2-oxoglutarate dehydrogenase, mitochondrial isoform 2 precursor                      |      |       |       | 1.08 | 1.02 |      |      |       |       |      |
| NP_112241.2    | PABPC3       | polyadenylate-binding protein 3                                                      |      |       |       | 0.92 | 1.82 |      | 0.51 | 1.08  |       |      |
| NP_009193.2    | PARK7        | protein DJ-1                                                                         | 2.35 | 3.05  | 5.81  | 1.26 | 1.57 | 1.00 |      |       |       |      |
| NP_001609.2    | PARP1        | poly [ADP-ribose] polymerase 1                                                       |      |       |       | 0.96 |      |      |      |       |       |      |
| NP_065090.1    | PCNP         | PEST proteolytic signal-containing nuclear protein                                   |      |       |       | 0.56 | 0.73 |      |      |       |       |      |
| NP_037364.1    | PDCD6        | programmed cell death protein 6                                                      | 0.88 | 1.16  |       |      |      |      |      |       |       |      |
| NP_071736.1    | PDF          | peptide deformylase, mitochondrial precursor                                         |      |       |       | 0.49 | 0.71 |      |      |       |       |      |

|                |        |                                                                                                    |      |       |       |       |      |        |      |      |      |      |      |      |
|----------------|--------|----------------------------------------------------------------------------------------------------|------|-------|-------|-------|------|--------|------|------|------|------|------|------|
| NP_001166927.1 | PDHA1  | pyruvate dehydrogenase E1 component subunit alpha, somatic form, mitochondrial isoform 4 precursor |      |       |       | 1.32  | 1.71 |        |      |      |      |      |      |      |
| NP_066272.1    | PDLIM1 | PDZ and LIM domain protein 1                                                                       |      |       |       |       |      |        |      |      |      | 0.42 | 1.23 | 7.80 |
| NP_036525.1    | PFAS   | phosphoribosylformylglycinamidine synthase                                                         | 8.76 | 11.68 | 22.44 |       |      |        |      |      |      |      |      |      |
| NP_002618.1    | PFKP   | 6-phosphofructokinase type C isoform 1                                                             | 3.41 | 2.30  | 16.37 |       |      |        |      |      |      |      |      |      |
| NP_444252.1    | PFN2   | profilin-2 isoform a                                                                               |      |       |       | 0.52  | 1.28 |        |      |      |      |      |      |      |
| NP_002624.2    | PGM1   | phosphoglucomutase-1 isoform 1                                                                     | 0.86 | 1.19  | 1.72  |       |      |        |      |      |      |      |      |      |
| NP_006658.1    | PGRMC1 | membrane-associated progesterone receptor component 1                                              |      |       |       | 0.84  | 1.43 | 1.55   |      |      |      |      |      |      |
| NP_000287.3    | PKD1   | polycystin-1 isoform 2 precursor                                                                   |      |       |       | 1.16  | 1.38 |        |      |      |      |      |      |      |
| NP_958783.1    | PLEC   | plectin isoform 1d                                                                                 | 0.46 | 0.48  | 30.21 | 0.58  | 0.37 | 0.41   | 0.40 | 0.48 |      |      |      |      |
| NP_857634.1    | PRDX5  | peroxiredoxin-5, mitochondrial isoform b precursor                                                 |      |       |       | 0.24  | 0.10 | 0.27   |      |      |      |      |      |      |
| NP_009129.1    | PROSC  | proline synthase co-transcribed bacterial homolog protein                                          | 0.53 | 0.55  | 1.99  | 0.36  |      |        |      |      |      |      |      |      |
| NP_066977.1    | PSAT1  | phosphoserine aminotransferase isoform 2                                                           | 1.83 | 6.26  |       |       |      |        |      |      |      |      |      |      |
| NP_002778.1    | PSMA2  | proteasome subunit alpha type-2                                                                    | 1.27 | 1.70  | 3.80  | 1.05  | 1.41 | 1.07   |      |      |      |      |      |      |
| NP_001096138.1 | PSMA4  | proteasome subunit alpha type-4 isoform 2                                                          | 1.02 | 1.88  |       | 0.99  | 1.44 |        |      |      |      |      |      |      |
| NP_002781.2    | PSMA5  | proteasome subunit alpha type-5 isoform 1                                                          |      |       |       | 0.87  | 1.35 |        |      |      |      |      |      |      |
| NP_002783.1    | PSMA7  | proteasome subunit alpha type-7                                                                    |      |       |       | 0.79  | 1.51 |        |      |      |      |      |      |      |
| NP_001020268.1 | PSMA8  | proteasome subunit alpha type-7-like isoform 3                                                     | 1.04 | 1.88  |       |       |      |        |      |      |      |      |      |      |
| NP_001186708.1 | PSMB2  | proteasome subunit beta type-2 isoform 2                                                           | 1.51 | 2.02  |       |       |      |        |      |      |      |      |      |      |
| NP_002786.2    | PSMB3  | proteasome subunit beta type-3                                                                     |      |       |       | 1.01  | 1.20 | 1.03   |      |      |      |      |      |      |
| NP_002787.2    | PSMB4  | proteasome subunit beta type-4                                                                     |      |       |       | 1.10  | 1.21 |        |      |      |      |      |      |      |
| NP_002809.2    | PSME2  | proteasome activator complex subunit 2                                                             |      |       |       | 0.10  | 2.67 |        |      |      |      |      |      |      |
| NP_001093136.1 | PTAR1  | protein prenyltransferase alpha subunit repeat-containing protein 1                                |      |       |       | 0.67  | 1.20 |        | 0.36 | 1.08 |      |      |      |      |
| NP_002815.3    | PTMS   | parathymsin                                                                                        |      |       |       | 0.24  | 1.12 |        |      |      |      |      |      |      |
| NP_001157412.1 | PYGL   | glycogen phosphorylase, liver form isoform 2                                                       | 7.19 | 5.16  | 51.68 | 15.24 | 1.00 | 398.23 |      |      |      |      |      |      |
| NP_004654.1    | RAB11A | ras-related protein Rab-11A isoform 1                                                              |      |       |       | 0.37  | 0.47 |        | 0.11 | 0.96 |      |      |      |      |
| NP_057406.2    | RAB14  | ras-related protein Rab-14                                                                         |      |       |       | 0.60  | 1.36 | 0.73   |      |      |      |      |      |      |
| NP_004152.1    | RAB1A  | ras-related protein Rab-1A isoform 1                                                               |      |       |       | 0.75  | 1.04 | 1.26   |      |      |      |      |      |      |
| NP_002860.2    | RAB6A  | ras-related protein Rab-6A isoform a                                                               |      |       |       | 0.87  | 1.01 |        |      |      |      |      |      |      |
| NP_005393.2    | RALA   | ras-related protein Ral-A precursor                                                                |      |       |       |       |      |        | 0.34 | 0.50 | 3.75 |      |      |      |
| NP_002872.1    | RALB   | ras-related protein Ral-B precursor                                                                |      |       |       |       |      |        | 0.30 | 0.85 |      |      |      |      |
| NP_002875.1    | RAP1A  | ras-related protein Rap-1A precursor                                                               |      |       |       |       |      |        | 0.57 | 2.20 |      |      |      |      |
| NP_002878.2    | RARS   | arginyl-tRNA synthetase, cytoplasmic                                                               |      |       |       |       |      |        | 0.71 | 1.20 | 2.82 |      |      |      |
| NP_006734.1    | RBM3   | putative RNA-binding protein 3                                                                     |      |       |       | 0.45  | 0.66 |        |      |      |      |      |      |      |
| NP_005096.1    | RBM8A  | RNA-binding protein 8A                                                                             |      |       |       | 1.20  | 1.32 |        |      |      |      |      |      |      |
| NP_061185.1    | RCC2   | protein RCC2                                                                                       |      |       |       | 0.65  |      | 0.94   |      |      |      |      |      |      |
| NP_056338.2    | REXO2  | oligoribonuclease, mitochondrial precursor                                                         |      |       |       |       | 1.39 |        |      |      |      |      |      |      |
| NP_001036143.1 | RHOC   | rho-related GTP-binding protein RhoC precursor                                                     |      |       |       | 0.86  | 0.69 |        |      |      |      |      |      |      |
| NP_001656.2    | RHOG   | rho-related GTP-binding protein RhoG precursor                                                     |      |       |       | 0.76  | 1.05 |        |      |      |      |      |      |      |
| NP_542784.1    | RPL10L | 60S ribosomal protein L10-like                                                                     |      |       |       | 0.99  | 1.16 |        | 0.52 | 0.92 |      |      |      |      |
| NP_000979.1    | RPL27  | 60S ribosomal protein L27                                                                          |      |       |       |       |      |        | 0.33 | 0.20 | 0.91 |      |      |      |
| NP_000982.2    | RPL28  | 60S ribosomal protein L28 isoform 2                                                                |      |       |       | 0.88  | 1.16 | 0.90   | 0.46 | 0.88 | 1.62 |      |      |      |
| NP_001093163.1 | RPL31  | 60S ribosomal protein L31 isoform 3                                                                | 1.09 | 1.55  | 3.85  |       |      |        |      |      |      |      |      |      |
| NP_296374.1    | RPL34  | 60S ribosomal protein L34                                                                          |      |       |       | 1.29  | 1.41 |        |      |      |      |      |      |      |
| NP_000988.1    | RPL37  | 60S ribosomal protein L37                                                                          |      |       |       | 1.08  | 1.24 |        |      |      |      |      |      |      |

|                |          |                                                                        |      |      |       |      |      |       |
|----------------|----------|------------------------------------------------------------------------|------|------|-------|------|------|-------|
| NP_001016.1    | RPS23    | 40S ribosomal protein S23                                              | 0.90 | 1.20 | 1.18  | 0.37 | 0.89 | 1.33  |
| NP_001017.1    | RPS24    | 40S ribosomal protein S24 isoform c                                    | 0.97 | 1.27 |       |      |      |       |
| NP_006657.1    | RUVBL2   | ruvB-like 2                                                            |      |      |       | 0.78 | 1.24 | 2.66  |
| NP_002957.1    | S100A10  | protein S100-A10                                                       |      |      |       | 0.48 | 0.80 | 3.60  |
| NP_055439.1    | S100A6   | protein S100-A6                                                        | 0.30 | 0.25 | 0.34  |      |      |       |
| NP_006799.1    | SEC61B   | protein transport protein Sec61 subunit beta                           | 1.17 | 2.48 |       |      |      |       |
| NP_003002.2    | SET      | protein SET isoform 2                                                  |      |      |       | 1.80 | 2.21 | 4.46  |
| NP_006833.2    | SF3B2    | splicing factor 3B subunit 2                                           | 0.95 | 1.04 | 0.91  |      |      |       |
| NP_001035887.1 | SLC16A3  | monocarboxylate transporter 4                                          |      |      |       | 0.48 | 1.58 | 2.72  |
| NP_005619.1    | SLC1A5   | neutral amino acid transporter B(0) isoform 1                          |      |      |       | 1.59 | 4.43 | 6.34  |
| NP_005975.1    | SLC25A1  | tricarboxylate transport protein, mitochondrial precursor              | 0.36 | 0.43 |       |      |      |       |
| NP_001158890.1 | SLC25A11 | mitochondrial 2-oxoglutarate/malate carrier protein isoform 3          |      |      |       | 0.38 | 0.81 | 1.27  |
| NP_003477.4    | SLC7A5   | large neutral amino acids transporter small subunit 1                  | 1.02 | 0.39 | 0.75  | 0.66 | 0.91 | 3.05  |
| NP_112487.1    | SLIRP    | SRA stem-loop-interacting RNA-binding protein, mitochondrial precursor | 1.25 | 1.66 | 1.73  |      |      |       |
| NP_570710.1    | SNAP23   | synaptosomal-associated protein 23 isoform SNAP23B                     |      |      |       | 0.17 | 1.27 |       |
| NP_003078.2    | SNCG     | gamma-synuclein                                                        | 2.47 | 0.69 |       |      |      |       |
| NP_004588.1    | SNRPD2   | small nuclear ribonucleoprotein Sm D2 isoform 1                        | 0.92 | 1.16 |       |      |      |       |
| NP_000627.2    | SOD2     | superoxide dismutase [Mn], mitochondrial isoform A precursor           | 0.30 | 1.32 |       |      |      |       |
| NP_003962.3    | SPAG9    | C-Jun-amino-terminal kinase-interacting protein 4 isoform 3            | 0.54 | 0.93 |       |      |      |       |
| NP_004167.3    | SREBF1   | sterol regulatory element-binding protein 1 isoform b                  | 0.87 | 0.56 | 2.55  |      |      |       |
| NP_001191123.1 | SRP19    | signal recognition particle 19 kDa protein isoform 3                   | 0.90 | 1.14 |       |      |      |       |
| NP_067026.3    | SRPRB    | signal recognition particle receptor subunit beta                      |      |      |       | 0.24 | 0.78 | 1.85  |
| NP_008855.1    | SRSF1    | serine/arginine-rich splicing factor 1 isoform 1                       | 1.00 | 1.13 | 0.84  |      |      |       |
| NP_006810.1    | STIP1    | stress-induced-phosphoprotein 1                                        | 1.41 | 2.00 | 4.79  |      |      |       |
| NP_004090.4    | STOM     | erythrocyte band 7 integral membrane protein isoform a                 |      |      |       | 0.70 | 2.74 | 3.76  |
| NP_001005849.1 | SUMO2    | small ubiquitin-related modifier 2 isoform b precursor                 | 0.65 | 1.11 |       |      |      |       |
| NP_689508.3    | TARS     | threonyl-tRNA synthetase, cytoplasmic                                  | 1.26 | 1.63 | 14.73 |      |      |       |
| NP_006584.1    | TBR1     | T-box brain protein 1                                                  | 1.58 | 2.22 |       |      |      |       |
| NP_110379.2    | TCP1     | T-complex protein 1 subunit alpha isoform a                            | 1.06 | 0.25 | 3.69  |      |      |       |
| NP_001008897.1 | TCP1     | T-complex protein 1 subunit alpha isoform b                            | 0.90 | 1.16 | 0.90  |      |      |       |
| NP_001180305.1 | TERT     | telomerase reverse transcriptase isoform 2                             | 1.13 | 1.33 |       |      |      |       |
| NP_003225.2    | TFRC     | transferrin receptor protein 1                                         | 0.73 | 3.30 |       |      |      |       |
| NP_001027454.1 | TMPO     | thymopoietin isoform beta                                              | 0.79 | 1.31 |       |      |      |       |
| NP_061882.2    | TOLLIP   | toll-interacting protein                                               |      |      |       | 0.81 | 3.96 | 34.70 |
| NP_064628.1    | TOMM22   | mitochondrial import receptor subunit TOM22 homolog                    | 1.22 | 1.26 |       |      |      |       |
| NP_003277.1    | TOP1     | DNA topoisomerase 1                                                    | 1.53 | 2.44 | 1.20  |      |      |       |
| NP_955391.1    | TPD52L2  | tumor protein D54 isoform f                                            | 0.55 |      |       |      |      |       |
| NP_001036817.1 | TPM3     | tropomyosin alpha-3 chain isoform 3                                    |      |      |       | 0.35 | 1.30 | 1.54  |
| NP_003282.2    | TPP2     | tripeptidyl-peptidase 2                                                | 1.45 | 2.01 | 3.98  |      |      |       |
| NP_003286.1    | TPT1     | translationally-controlled tumor protein                               | 1.59 | 1.05 | 2.81  |      |      |       |
| NP_116093.1    | TUBA1C   | tubulin alpha-1C chain                                                 | 0.95 | 1.27 | 2.94  | 0.55 | 0.87 | 1.87  |
| NP_877420.1    | TXNRD1   | thioredoxin reductase 1, cytoplasmic isoform 2                         |      | 3.28 |       |      |      |       |
