# Supplementary material for: Integrated Proteomic and Metabolic Analysis of Breast Cancer Progression
Source: PubMed Central journal article supplement (PMC3785415; doi:10.1371/journal.pone.0076220), 2013-09-27
Supplement: pone.0076220.s002.pdf [file pone.0076220.s002.pdf]

**Table S2.** Functional annotation clustering of cytosol enriched proteins

|                      |                                                    |       |      |         |                 |
|----------------------|----------------------------------------------------|-------|------|---------|-----------------|
| Annotation Cluster 1 | Enrichment Score: 10.380168698390056               |       |      |         |                 |
| Category             | Term                                               | Count | %    | PValue  | Fold Enrichment |
| GOTERM_BP_FAT        | GO:0006007~glucose catabolic process               | 12    | 9.09 | 5.5E-12 | 21.70           |
| GOTERM_BP_FAT        | GO:0019320~hexose catabolic process                | 12    | 9.09 | 4.0E-11 | 18.24           |
| GOTERM_BP_FAT        | GO:0046365~monosaccharide catabolic process        | 12    | 9.09 | 5.6E-11 | 17.72           |
| GOTERM_BP_FAT        | GO:0046164~alcohol catabolic process               | 12    | 9.09 | 2.4E-10 | 15.54           |
| Annotation Cluster 2 | Enrichment Score: 8.911831563001835                |       |      |         |                 |
| Category             | Term                                               | Count | %    | PValue  | Fold Enrichment |
| SP_PIR_KEYWORDS      | glycolysis                                         | 10    | 7.58 | 1.4E-11 | 33.12           |
| GOTERM_BP_FAT        | GO:0006096~glycolysis                              | 10    | 7.58 | 4.6E-10 | 22.31           |
| KEGG_PATHWAY         | hsa00010:Glycolysis / Gluconeogenesis              | 10    | 7.58 | 2.9E-07 | 10.46           |
| Annotation Cluster 3 | Enrichment Score: 8.028021927784092                |       |      |         |                 |
| Category             | Term                                               | Count | %    | PValue  | Fold Enrichment |
| GOTERM_BP_FAT        | GO:0044275~cellular carbohydrate catabolic process | 13    | 9.85 | 2.2E-11 | 16.04           |
| GOTERM_BP_FAT        | GO:0016052~carbohydrate catabolic process          | 13    | 9.85 | 4.4E-10 | 12.51           |
| GOTERM_BP_FAT        | GO:0006006~glucose metabolic process               | 13    | 9.85 | 2.2E-08 | 8.91            |
| GOTERM_BP_FAT        | GO:0019318~hexose metabolic process                | 13    | 9.85 | 2.7E-07 | 7.10            |
| GOTERM_BP_FAT        | GO:0005996~monosaccharide metabolic process        | 13    | 9.85 | 1.3E-06 | 6.14            |
| Annotation Cluster 4 | Enrichment Score: 6.117884930664276                |       |      |         |                 |
| Category             | Term                                               | Count | %    | PValue  | Fold Enrichment |
| SP_PIR_KEYWORDS      | ribosome                                           | 10    | 7.58 | 1.6E-09 | 19.96           |
| GOTERM_CC_FAT        | GO:0022626~cytosolic ribosome                      | 10    | 7.58 | 3.1E-08 | 14.09           |
| SP_PIR_KEYWORDS      | ribosomal protein                                  | 10    | 7.58 | 5.7E-06 | 7.75            |
| KEGG_PATHWAY         | hsa03010:Ribosome                                  | 10    | 7.58 | 7.1E-06 | 7.22            |
| SP_PIR_KEYWORDS      | ribonucleoprotein                                  | 10    | 7.58 | 1.3E-04 | 5.22            |
| Annotation Cluster 5 | Enrichment Score: 5.177701919800204                |       |      |         |                 |
| Category             | Term                                               | Count | %    | PValue  | Fold Enrichment |
| SP_PIR_KEYWORDS      | endonexin fold                                     | 5     | 3.79 | 6.5E-07 | 66.24           |
| SMART                | SM00335:ANX                                        | 5     | 3.79 | 7.2E-07 | 64.85           |
| SP_PIR_KEYWORDS      | annexin                                            | 5     | 3.79 | 2.0E-06 | 52.04           |
| UP_SEQ_FEATURE       | repeat:Annexin 1                                   | 5     | 3.79 | 2.0E-06 | 51.71           |
| UP_SEQ_FEATURE       | repeat:Annexin 3                                   | 5     | 3.79 | 2.0E-06 | 51.71           |
| UP_SEQ_FEATURE       | repeat:Annexin 2                                   | 5     | 3.79 | 2.0E-06 | 51.71           |
| UP_SEQ_FEATURE       | repeat:Annexin 4                                   | 5     | 3.79 | 2.0E-06 | 51.71           |
| SP_PIR_KEYWORDS      | calcium/phospholipid-binding                       | 5     | 3.79 | 2.6E-06 | 48.57           |
| INTERPRO             | IPR018252:Annexin repeat, conserved site           | 5     | 3.79 | 3.4E-06 | 45.07           |

|                 |                                                   |   |      |         |       |
|-----------------|---------------------------------------------------|---|------|---------|-------|
| INTERPRO        | IPR018502:Annexin repeat                          | 5 | 3.79 | 3.4E-06 | 45.07 |
| INTERPRO        | IPR001464:Annexin                                 | 5 | 3.79 | 3.4E-06 | 45.07 |
| GOTERM_MF_FAT   | GO:0004859~phospholipase inhibitor activity       | 5 | 3.79 | 3.6E-06 | 43.63 |
| GOTERM_MF_FAT   | GO:0055102~lipase inhibitor activity              | 5 | 3.79 | 9.7E-06 | 34.90 |
| SP_PIR_KEYWORDS | phospholipid binding                              | 5 | 3.79 | 1.4E-05 | 33.12 |
| PIR_SUPERFAMILY | PIRSF002359:annexin I                             | 5 | 3.79 | 1.5E-05 | 30.21 |
| GOTERM_MF_FAT   | GO:0005544~calcium-dependent phospholipid binding | 5 | 3.79 | 9.8E-05 | 20.13 |
| GOTERM_MF_FAT   | GO:0005543~phospholipid binding                   | 5 | 3.79 | 8.7E-02 | 2.96  |

Annotation Cluster 6 Enrichment Score: 4.793971688099384

| Category       | Term           | Count | %    | PValue  | Fold Enrichment |
|----------------|----------------|-------|------|---------|-----------------|
| UP_SEQ_FEATURE | repeat:HEAT 6  | 6     | 4.55 | 1.7E-06 | 28.96           |
| UP_SEQ_FEATURE | repeat:HEAT 5  | 6     | 4.55 | 3.9E-06 | 24.82           |
| UP_SEQ_FEATURE | repeat:HEAT 4  | 6     | 4.55 | 1.1E-05 | 20.20           |
| UP_SEQ_FEATURE | repeat:HEAT 3  | 6     | 4.55 | 2.3E-05 | 17.38           |
| UP_SEQ_FEATURE | repeat:HEAT 2  | 6     | 4.55 | 4.8E-05 | 14.98           |
| UP_SEQ_FEATURE | repeat:HEAT 1  | 6     | 4.55 | 4.8E-05 | 14.98           |
| INTERPRO       | IPR000357:HEAT | 6     | 4.55 | 7.1E-05 | 13.77           |

Annotation Cluster 7 Enrichment Score: 4.641813968720388

| Category        | Term                                                       | Count | %    | PValue  | Fold Enrichment |
|-----------------|------------------------------------------------------------|-------|------|---------|-----------------|
| SMART           | SM00101:14_3_3                                             | 4     | 3.03 | 5.1E-06 | 103.76          |
| UP_SEQ_FEATURE  | site:Interaction with phosphoserine on interacting protein | 4     | 3.03 | 1.1E-05 | 82.74           |
| INTERPRO        | IPR000308:14-3-3 protein                                   | 4     | 3.03 | 1.6E-05 | 72.12           |
| PIR_SUPERFAMILY | PIRSF000868:14-3-3                                         | 4     | 3.03 | 8.3E-05 | 41.43           |
| PIR_SUPERFAMILY | PIRSF000868:14-3-3 protein                                 | 4     | 3.03 | 8.3E-05 | 41.43           |

Annotation Cluster 8 Enrichment Score: 4.460457489749598

| Category       | Term                                            | Count | %    | PValue  | Fold Enrichment |
|----------------|-------------------------------------------------|-------|------|---------|-----------------|
| UP_SEQ_FEATURE | domain:Importin N-terminal                      | 5     | 3.79 | 2.0E-06 | 51.71           |
| INTERPRO       | IPR001494:Importin-beta, N-terminal             | 5     | 3.79 | 4.7E-06 | 42.07           |
| GOTERM_BP_FAT  | GO:0000059~protein import into nucleus, docking | 5     | 3.79 | 1.7E-05 | 30.84           |
| GOTERM_MF_FAT  | GO:0008565~protein transporter activity         | 5     | 3.79 | 9.3E-03 | 6.02            |

Annotation Cluster 9 Enrichment Score: 4.145530740431766

| Category      | Term                                           | Count | %     | PValue  | Fold Enrichment |
|---------------|------------------------------------------------|-------|-------|---------|-----------------|
| GOTERM_BP_FAT | GO:0042981~regulation of apoptosis             | 21    | 15.91 | 6.4E-05 | 2.74            |
| GOTERM_BP_FAT | GO:0043067~regulation of programmed cell death | 21    | 15.91 | 7.4E-05 | 2.71            |
| GOTERM_BP_FAT | GO:0010941~regulation of cell death            | 21    | 15.91 | 7.7E-05 | 2.70            |

Annotation Cluster 10 Enrichment Score: 3.9005096948506717

| Category | Term | Count | % | PValue | Fold Enrichment |
|----------|------|-------|---|--------|-----------------|
|----------|------|-------|---|--------|-----------------|

|                       |                                                                 |       |       |         |                 |
|-----------------------|-----------------------------------------------------------------|-------|-------|---------|-----------------|
| INTERPRO              | IPR013126:Heat shock protein 70                                 | 4     | 3.03  | 9.9E-05 | 42.07           |
| INTERPRO              | IPR001023:Heat shock protein Hsp70                              | 4     | 3.03  | 9.9E-05 | 42.07           |
| INTERPRO              | IPR018181:Heat shock protein 70, conserved site                 | 4     | 3.03  | 2.0E-04 | 33.65           |
| Annotation Cluster 11 | Enrichment Score: 3.234845013098904                             |       |       |         |                 |
| Category              | Term                                                            | Count | %     | PValue  | Fold Enrichment |
| GOTERM_BP_FAT         | GO:0043066~negative regulation of apoptosis                     | 12    | 9.09  | 5.3E-04 | 3.55            |
| GOTERM_BP_FAT         | GO:0043069~negative regulation of programmed cell death         | 12    | 9.09  | 6.0E-04 | 3.51            |
| GOTERM_BP_FAT         | GO:0060548~negative regulation of cell death                    | 12    | 9.09  | 6.1E-04 | 3.50            |
| Annotation Cluster 12 | Enrichment Score: 3.155627276223362                             |       |       |         |                 |
| Category              | Term                                                            | Count | %     | PValue  | Fold Enrichment |
| UP_SEQ_FEATURE        | repeat:HEAT 23                                                  | 3     | 2.27  | 2.8E-04 | 108.60          |
| UP_SEQ_FEATURE        | repeat:HEAT 22                                                  | 3     | 2.27  | 2.8E-04 | 108.60          |
| UP_SEQ_FEATURE        | repeat:HEAT 21                                                  | 3     | 2.27  | 2.8E-04 | 108.60          |
| UP_SEQ_FEATURE        | repeat:HEAT 20                                                  | 3     | 2.27  | 2.8E-04 | 108.60          |
| UP_SEQ_FEATURE        | repeat:HEAT 24                                                  | 3     | 2.27  | 2.8E-04 | 108.60          |
| UP_SEQ_FEATURE        | repeat:HEAT 16                                                  | 3     | 2.27  | 2.8E-04 | 108.60          |
| UP_SEQ_FEATURE        | repeat:HEAT 17                                                  | 3     | 2.27  | 2.8E-04 | 108.60          |
| UP_SEQ_FEATURE        | repeat:HEAT 18                                                  | 3     | 2.27  | 2.8E-04 | 108.60          |
| UP_SEQ_FEATURE        | repeat:HEAT 19                                                  | 3     | 2.27  | 2.8E-04 | 108.60          |
| UP_SEQ_FEATURE        | repeat:HEAT 15                                                  | 3     | 2.27  | 9.6E-04 | 62.06           |
| UP_SEQ_FEATURE        | repeat:HEAT 14                                                  | 3     | 2.27  | 1.6E-03 | 48.27           |
| UP_SEQ_FEATURE        | repeat:HEAT 13                                                  | 3     | 2.27  | 2.0E-03 | 43.44           |
| UP_SEQ_FEATURE        | repeat:HEAT 12                                                  | 3     | 2.27  | 2.0E-03 | 43.44           |
| UP_SEQ_FEATURE        | repeat:HEAT 11                                                  | 3     | 2.27  | 2.5E-03 | 39.49           |
| UP_SEQ_FEATURE        | repeat:HEAT 9                                                   | 3     | 2.27  | 4.6E-03 | 28.96           |
| UP_SEQ_FEATURE        | repeat:HEAT 10                                                  | 3     | 2.27  | 4.6E-03 | 28.96           |
| Annotation Cluster 13 | Enrichment Score: 3.098788033864193                             |       |       |         |                 |
| Category              | Term                                                            | Count | %     | PValue  | Fold Enrichment |
| GOTERM_BP_FAT         | GO:0043623~cellular protein complex assembly                    | 10    | 7.58  | 2.3E-05 | 6.47            |
| GOTERM_BP_FAT         | GO:0034622~cellular macromolecular complex assembly             | 10    | 7.58  | 3.2E-03 | 3.30            |
| GOTERM_BP_FAT         | GO:0034621~cellular macromolecular complex subunit organization | 10    | 7.58  | 6.8E-03 | 2.94            |
| Annotation Cluster 14 | Enrichment Score: 3.0058451605448546                            |       |       |         |                 |
| Category              | Term                                                            | Count | %     | PValue  | Fold Enrichment |
| GOTERM_MF_FAT         | GO:0032553~ribonucleotide binding                               | 32    | 24.24 | 7.7E-04 | 1.82            |
| GOTERM_MF_FAT         | GO:0032555~purine ribonucleotide binding                        | 32    | 24.24 | 7.7E-04 | 1.82            |
| GOTERM_MF_FAT         | GO:0017076~purine nucleotide binding                            | 32    | 24.24 | 1.6E-03 | 1.75            |
| Annotation Cluster 15 | Enrichment Score: 2.986663397389544                             |       |       |         |                 |

| Category              | Term                                                                              | Count | %     | PValue  | Fold Enrichment |
|-----------------------|-----------------------------------------------------------------------------------|-------|-------|---------|-----------------|
| UP_SEQ_FEATURE        | active site:Cysteine sulfenic acid (-SOH) intermediate                            | 4     | 3.03  | 6.2E-06 | 96.53           |
| INTERPRO              | IPR000866:Alkyl hydroperoxide reductase/ Thiol specific antioxidant/ Mal allergen | 4     | 3.03  | 1.6E-05 | 72.12           |
| SP_PIR_KEYWORDS       | antioxidant                                                                       | 4     | 3.03  | 2.5E-05 | 64.76           |
| GOTERM_MF_FAT         | GO:0051920~peroxiredoxin activity                                                 | 4     | 3.03  | 4.5E-05 | 52.35           |
| SP_PIR_KEYWORDS       | peroxidase                                                                        | 4     | 3.03  | 6.4E-04 | 23.32           |
| UP_SEQ_FEATURE        | domain:Thioredoxin                                                                | 4     | 3.03  | 1.5E-03 | 17.55           |
| GOTERM_BP_FAT         | GO:0034614~cellular response to reactive oxygen species                           | 4     | 3.03  | 2.8E-03 | 13.98           |
| INTERPRO              | IPR017936:Thioredoxin-like                                                        | 4     | 3.03  | 2.8E-03 | 14.02           |
| SP_PIR_KEYWORDS       | Redox-active center                                                               | 4     | 3.03  | 2.9E-03 | 13.88           |
| GOTERM_MF_FAT         | GO:0004601~peroxidase activity                                                    | 4     | 3.03  | 3.4E-03 | 13.09           |
| GOTERM_MF_FAT         | GO:0016684~oxidoreductase activity, acting on peroxide as acceptor                | 4     | 3.03  | 3.4E-03 | 13.09           |
| GOTERM_BP_FAT         | GO:0034599~cellular response to oxidative stress                                  | 4     | 3.03  | 7.7E-03 | 9.76            |
| GOTERM_MF_FAT         | GO:0016209~antioxidant activity                                                   | 4     | 3.03  | 9.9E-03 | 8.91            |
| GOTERM_BP_FAT         | GO:0045454~cell redox homeostasis                                                 | 4     | 3.03  | 2.2E-02 | 6.66            |
| GOTERM_BP_FAT         | GO:0000302~response to reactive oxygen species                                    | 4     | 3.03  | 3.4E-02 | 5.59            |
| Annotation Cluster 16 | Enrichment Score: 2.9553752490507255                                              |       |       |         |                 |
| Category              | Term                                                                              | Count | %     | PValue  | Fold Enrichment |
| GOTERM_BP_FAT         | GO:0046496~nicotinamide nucleotide metabolic process                              | 5     | 3.79  | 5.4E-04 | 13.11           |
| GOTERM_BP_FAT         | GO:0006769~nicotinamide metabolic process                                         | 5     | 3.79  | 5.4E-04 | 13.11           |
| GOTERM_BP_FAT         | GO:0009820~alkaloid metabolic process                                             | 5     | 3.79  | 5.9E-04 | 12.79           |
| GOTERM_BP_FAT         | GO:0019362~pyridine nucleotide metabolic process                                  | 5     | 3.79  | 6.5E-04 | 12.48           |
| GOTERM_BP_FAT         | GO:0006733~oxidoreduction coenzyme metabolic process                              | 5     | 3.79  | 1.5E-03 | 10.08           |
| GOTERM_BP_FAT         | GO:0043603~cellular amide metabolic process                                       | 5     | 3.79  | 1.9E-03 | 9.36            |
| GOTERM_BP_FAT         | GO:0019748~secondary metabolic process                                            | 5     | 3.79  | 6.7E-03 | 6.64            |
| Annotation Cluster 17 | Enrichment Score: 2.9081886504762418                                              |       |       |         |                 |
| Category              | Term                                                                              | Count | %     | PValue  | Fold Enrichment |
| GOTERM_CC_FAT         | GO:0005643~nuclear pore                                                           | 6     | 4.55  | 6.1E-04 | 8.67            |
| GOTERM_BP_FAT         | GO:0006606~protein import into nucleus                                            | 6     | 4.55  | 1.3E-03 | 7.32            |
| GOTERM_BP_FAT         | GO:0051170~nuclear import                                                         | 6     | 4.55  | 1.5E-03 | 7.15            |
| GOTERM_BP_FAT         | GO:0034504~protein localization in nucleus                                        | 6     | 4.55  | 2.0E-03 | 6.69            |
| Annotation Cluster 18 | Enrichment Score: 2.893563616432318                                               |       |       |         |                 |
| Category              | Term                                                                              | Count | %     | PValue  | Fold Enrichment |
| GOTERM_BP_FAT         | GO:0070271~protein complex biogenesis                                             | 15    | 11.36 | 3.0E-04 | 3.11            |
| GOTERM_BP_FAT         | GO:0006461~protein complex assembly                                               | 15    | 11.36 | 3.0E-04 | 3.11            |
| GOTERM_BP_FAT         | GO:0065003~macromolecular complex assembly                                        | 15    | 11.36 | 4.1E-03 | 2.37            |
| GOTERM_BP_FAT         | GO:0043933~macromolecular complex subunit organization                            | 15    | 11.36 | 7.2E-03 | 2.22            |

| Annotation Cluster 19 |                           | Enrichment Score: 2.8087837900394588 |      |         |                 |
|-----------------------|---------------------------|--------------------------------------|------|---------|-----------------|
| Category              | Term                      | Count                                | %    | PValue  | Fold Enrichment |
| SMART                 | SM00262:GEL               | 3                                    | 2.27 | 7.8E-04 | 68.09           |
| UP_SEQ_FEATURE        | repeat:Gelsolin-like 1    | 3                                    | 2.27 | 1.3E-03 | 54.30           |
| UP_SEQ_FEATURE        | repeat:Gelsolin-like 2    | 3                                    | 2.27 | 1.3E-03 | 54.30           |
| UP_SEQ_FEATURE        | repeat:Gelsolin-like 3    | 3                                    | 2.27 | 1.3E-03 | 54.30           |
| INTERPRO              | IPR007122:Gelsolin        | 3                                    | 2.27 | 1.7E-03 | 47.33           |
| INTERPRO              | IPR007123:Gelsolin region | 3                                    | 2.27 | 5.2E-03 | 27.04           |

| Annotation Cluster 20 |                                    | Enrichment Score: 2.7952415595592583 |      |         |                 |
|-----------------------|------------------------------------|--------------------------------------|------|---------|-----------------|
| Category              | Term                               | Count                                | %    | PValue  | Fold Enrichment |
| SP_PIR_KEYWORDS       | pentose shunt                      | 3                                    | 2.27 | 1.4E-04 | 145.72          |
| GOTERM_BP_FAT         | GO:0006098~pentose-phosphate shunt | 3                                    | 2.27 | 3.1E-03 | 34.96           |
| GOTERM_BP_FAT         | GO:0006739~NADP metabolic process  | 3                                    | 2.27 | 9.8E-03 | 19.66           |

| Annotation Cluster 21 |                                                     | Enrichment Score: 2.350023807460341 |      |         |                 |
|-----------------------|-----------------------------------------------------|-------------------------------------|------|---------|-----------------|
| Category              | Term                                                | Count                               | %    | PValue  | Fold Enrichment |
| INTERPRO              | IPR002194:Chaperonin TCP-1, conserved site          | 3                                   | 2.27 | 2.6E-03 | 37.86           |
| INTERPRO              | IPR017998:Chaperone, tailless complex polypeptide 1 | 3                                   | 2.27 | 3.2E-03 | 34.42           |
| INTERPRO              | IPR002423:Chaperonin Cpn60/TCP-1                    | 3                                   | 2.27 | 6.0E-03 | 25.24           |
| PIR_SUPERFAMILY       | PIRSF002584:molecular chaperone t-complex-type      | 3                                   | 2.27 | 7.7E-03 | 21.75           |

| Annotation Cluster 22 |                                                    | Enrichment Score: 1.9426658366719283 |      |         |                 |
|-----------------------|----------------------------------------------------|--------------------------------------|------|---------|-----------------|
| Category              | Term                                               | Count                                | %    | PValue  | Fold Enrichment |
| GOTERM_BP_FAT         | GO:0032507~maintenance of protein location in cell | 4                                    | 3.03 | 6.8E-03 | 10.23           |
| GOTERM_BP_FAT         | GO:0045185~maintenance of protein location         | 4                                    | 3.03 | 1.0E-02 | 8.74            |
| GOTERM_BP_FAT         | GO:0051651~maintenance of location in cell         | 4                                    | 3.03 | 1.0E-02 | 8.74            |
| GOTERM_BP_FAT         | GO:0051235~maintenance of location                 | 4                                    | 3.03 | 2.3E-02 | 6.55            |

| Annotation Cluster 23 |                                                                 | Enrichment Score: 1.9076713225639956 |      |         |                 |
|-----------------------|-----------------------------------------------------------------|--------------------------------------|------|---------|-----------------|
| Category              | Term                                                            | Count                                | %    | PValue  | Fold Enrichment |
| INTERPRO              | IPR019479:Peroxiredoxin, C-terminal                             | 3                                    | 2.27 | 6.0E-04 | 75.72           |
| PIR_SUPERFAMILY       | PIRSF000239:alkyl hydroperoxide reductase C22 protein           | 3                                    | 2.27 | 1.8E-03 | 43.51           |
| GOTERM_BP_FAT         | GO:0042744~hydrogen peroxide catabolic process                  | 3                                    | 2.27 | 1.1E-02 | 18.51           |
| GOTERM_BP_FAT         | GO:0070301~cellular response to hydrogen peroxide               | 3                                    | 2.27 | 1.2E-02 | 17.48           |
| GOTERM_BP_FAT         | GO:0042743~hydrogen peroxide metabolic process                  | 3                                    | 2.27 | 2.3E-02 | 12.58           |
| GOTERM_BP_FAT         | GO:0042542~response to hydrogen peroxide                        | 3                                    | 2.27 | 9.8E-02 | 5.62            |
| GOTERM_BP_FAT         | GO:0006800~oxygen and reactive oxygen species metabolic process | 3                                    | 2.27 | 1.3E-01 | 4.70            |

| Annotation Cluster 24 |                                          | Enrichment Score: 1.7055341777652488 |       |         |                 |
|-----------------------|------------------------------------------|--------------------------------------|-------|---------|-----------------|
| Category              | Term                                     | Count                                | %     | PValue  | Fold Enrichment |
| GOTERM_MF_FAT         | GO:0032559~adenyl ribonucleotide binding | 24                                   | 18.18 | 1.3E-02 | 1.68            |

|               |                                      |    |       |         |      |
|---------------|--------------------------------------|----|-------|---------|------|
| GOTERM_MF_FAT | GO:0030554~adenyl nucleotide binding | 24 | 18.18 | 2.3E-02 | 1.59 |
| GOTERM_MF_FAT | GO:0001883~purine nucleoside binding | 24 | 18.18 | 2.6E-02 | 1.57 |
