# Supplementary material for: Integrated Proteomic and Metabolic Analysis of Breast Cancer Progression
Source: PubMed Central journal article supplement (PMC3785415; doi:10.1371/journal.pone.0076220), 2013-09-27
Supplement: pone.0076220.s003.pdf [file pone.0076220.s003.pdf]

**Table S3.** Functional annotation clustering of mitochondrial enriched proteins

|                      |                                                         |       |       |          |                 |
|----------------------|---------------------------------------------------------|-------|-------|----------|-----------------|
| Annotation Cluster 1 | Enrichment Score: 7.102275595840315                     |       |       |          |                 |
| Category             | Term                                                    | Count | %     | PValue   | Fold Enrichment |
| UP_SEQ_FEATURE       | region of interest:Coil 2                               | 7     | 14.58 | 1.07E-08 | 43.55           |
| UP_SEQ_FEATURE       | region of interest:Linker 12                            | 7     | 14.58 | 1.07E-08 | 43.55           |
| UP_SEQ_FEATURE       | region of interest:Coil 1B                              | 7     | 14.58 | 1.85E-08 | 39.82           |
| UP_SEQ_FEATURE       | region of interest:Coil 1A                              | 7     | 14.58 | 1.85E-08 | 39.82           |
| UP_SEQ_FEATURE       | region of interest:Linker 1                             | 7     | 14.58 | 1.85E-08 | 39.82           |
| UP_SEQ_FEATURE       | region of interest:Rod                                  | 7     | 14.58 | 2.02E-08 | 39.26           |
| UP_SEQ_FEATURE       | region of interest:Head                                 | 7     | 14.58 | 2.39E-08 | 38.18           |
| UP_SEQ_FEATURE       | region of interest:Tail                                 | 7     | 14.58 | 2.81E-08 | 37.16           |
| SP_PIR_KEYWORDS      | Intermediate filament                                   | 7     | 14.58 | 3.44E-08 | 35.96           |
| INTERPRO             | IPR018039:Intermediate filament protein, conserved site | 7     | 14.58 | 4.92E-08 | 33.74           |
| INTERPRO             | IPR016044:Filament                                      | 7     | 14.58 | 4.92E-08 | 33.74           |
| INTERPRO             | IPR001664:Intermediate filament protein                 | 7     | 14.58 | 5.35E-08 | 33.28           |
| PIR_SUPERFAMILY      | PIRSF002282:cytoskeletal keratin                        | 7     | 14.58 | 4.67E-07 | 22.33           |
| GOTERM_CC_FAT        | GO:0005882~intermediate filament                        | 7     | 14.58 | 3.56E-05 | 10.87           |
| GOTERM_CC_FAT        | GO:0045111~intermediate filament cytoskeleton           | 7     | 14.58 | 4.02E-05 | 10.63           |
| Annotation Cluster 2 | Enrichment Score: 3.5973888394005247                    |       |       |          |                 |
| Category             | Term                                                    | Count | %     | PValue   | Fold Enrichment |
| INTERPRO             | IPR003054:Type II keratin                               | 4     | 8.33  | 6.56E-05 | 49.58           |
| UP_SEQ_FEATURE       | site:Stutter                                            | 4     | 8.33  | 7.22E-05 | 48.27           |
| GOTERM_CC_FAT        | GO:0045095~keratin filament                             | 4     | 8.33  | 3.41E-03 | 12.91           |
| Annotation Cluster 3 | Enrichment Score: 3.2303540206247274                    |       |       |          |                 |
| Category             | Term                                                    | Count | %     | PValue   | Fold Enrichment |
| GOTERM_BP_FAT        | GO:0032507~maintenance of protein location in cell      | 4     | 8.33  | 3.36E-04 | 28.69           |
| GOTERM_BP_FAT        | GO:0051651~maintenance of location in cell              | 4     | 8.33  | 5.36E-04 | 24.51           |
| GOTERM_BP_FAT        | GO:0045185~maintenance of protein location              | 4     | 8.33  | 5.36E-04 | 24.51           |
| GOTERM_BP_FAT        | GO:0051235~maintenance of location                      | 4     | 8.33  | 1.24E-03 | 18.38           |
| Annotation Cluster 4 | Enrichment Score: 2.5370204671851457                    |       |       |          |                 |
| Category             | Term                                                    | Count | %     | PValue   | Fold Enrichment |
| GOTERM_BP_FAT        | GO:0016477~cell migration                               | 6     | 12.50 | 2.14E-03 | 6.39            |
| GOTERM_BP_FAT        | GO:0051674~localization of cell                         | 6     | 12.50 | 3.38E-03 | 5.75            |
| GOTERM_BP_FAT        | GO:0048870~cell motility                                | 6     | 12.50 | 3.38E-03 | 5.75            |
| Annotation Cluster 5 | Enrichment Score: 2.4451900472245636                    |       |       |          |                 |
| Category             | Term                                                    | Count | %     | PValue   | Fold Enrichment |
| GOTERM_CC_FAT        | GO:0008305~integrin complex                             | 4     | 8.33  | 1.31E-04 | 39.18           |

|                 |                                                |   |      |          |       |
|-----------------|------------------------------------------------|---|------|----------|-------|
| SP_PIR_KEYWORDS | integrin                                       | 4 | 8.33 | 1.37E-04 | 39.10 |
| GOTERM_BP_FAT   | GO:0007229~integrin-mediated signaling pathway | 4 | 8.33 | 1.61E-03 | 16.80 |
| GOTERM_BP_FAT   | GO:0007160~cell-matrix adhesion                | 4 | 8.33 | 3.20E-03 | 13.22 |
| GOTERM_BP_FAT   | GO:0031589~cell-substrate adhesion             | 4 | 8.33 | 4.20E-03 | 12.00 |
| GOTERM_CC_FAT   | GO:0043235~receptor complex                    | 4 | 8.33 | 7.36E-03 | 9.79  |
| KEGG_PATHWAY    | hsa04512:ECM-receptor interaction              | 4 | 8.33 | 1.28E-02 | 7.81  |
| SP_PIR_KEYWORDS | receptor                                       | 4 | 8.33 | 7.55E-01 | 1.01  |

Annotation Cluster 6 Enrichment Score: 2.2738113902647066

| Category        | Term                                 | Count | %    | PValue   | Fold Enrichment |
|-----------------|--------------------------------------|-------|------|----------|-----------------|
| UP_SEQ_FEATURE  | short sequence motif:Effector region | 4     | 8.33 | 1.65E-03 | 16.77           |
| INTERPRO        | IPR013753:Ras                        | 4     | 8.33 | 5.26E-03 | 11.11           |
| INTERPRO        | IPR001806:Ras GTPase                 | 4     | 8.33 | 6.51E-03 | 10.28           |
| SP_PIR_KEYWORDS | prenylation                          | 4     | 8.33 | 6.53E-03 | 10.28           |
| INTERPRO        | IPR005225:Small GTP-binding protein  | 4     | 8.33 | 1.16E-02 | 8.31            |

Annotation Cluster 7 Enrichment Score: 2.0849452533958215

| Category      | Term                          | Count | %     | PValue   | Fold Enrichment |
|---------------|-------------------------------|-------|-------|----------|-----------------|
| GOTERM_CC_FAT | GO:0005912~adherens junction  | 5     | 10.42 | 1.94E-03 | 9.16            |
| GOTERM_CC_FAT | GO:0070161~anchoring junction | 5     | 10.42 | 2.83E-03 | 8.26            |
| GOTERM_CC_FAT | GO:0030054~cell junction      | 5     | 10.42 | 1.02E-01 | 2.74            |

Annotation Cluster 8 Enrichment Score: 1.7775336376209747

| Category      | Term                                           | Count | %     | PValue   | Fold Enrichment |
|---------------|------------------------------------------------|-------|-------|----------|-----------------|
| GOTERM_BP_FAT | GO:0042981~regulation of apoptosis             | 8     | 16.67 | 1.60E-02 | 2.93            |
| GOTERM_BP_FAT | GO:0043067~regulation of programmed cell death | 8     | 16.67 | 1.69E-02 | 2.90            |
| GOTERM_BP_FAT | GO:0010941~regulation of cell death            | 8     | 16.67 | 1.72E-02 | 2.89            |

Annotation Cluster 9 Enrichment Score: 1.7471630816038997

| Category        | Term                                     | Count | %     | PValue   | Fold Enrichment |
|-----------------|------------------------------------------|-------|-------|----------|-----------------|
| UP_SEQ_FEATURE  | nucleotide phosphate-binding region:GTP  | 5     | 10.42 | 5.89E-03 | 6.75            |
| SP_PIR_KEYWORDS | gtp-binding                              | 5     | 10.42 | 8.41E-03 | 6.09            |
| GOTERM_MF_FAT   | GO:0005525~GTP binding                   | 5     | 10.42 | 3.15E-02 | 4.06            |
| GOTERM_MF_FAT   | GO:0019001~guanyl nucleotide binding     | 5     | 10.42 | 3.43E-02 | 3.95            |
| GOTERM_MF_FAT   | GO:0032561~guanyl ribonucleotide binding | 5     | 10.42 | 3.43E-02 | 3.95            |

Annotation Cluster 10 Enrichment Score: 1.5916771030995296

| Category      | Term                                                              | Count | %    | PValue   | Fold Enrichment |
|---------------|-------------------------------------------------------------------|-------|------|----------|-----------------|
| GOTERM_BP_FAT | GO:0008064~regulation of actin polymerization or depolymerization | 3     | 6.25 | 1.75E-02 | 14.46           |
| GOTERM_BP_FAT | GO:0030832~regulation of actin filament length                    | 3     | 6.25 | 1.86E-02 | 14.00           |
| GOTERM_BP_FAT | GO:0032956~regulation of actin cytoskeleton organization          | 3     | 6.25 | 3.53E-02 | 9.91            |
| GOTERM_BP_FAT | GO:0032970~regulation of actin filament-based process             | 3     | 6.25 | 3.75E-02 | 9.59            |

| Annotation Cluster 11 |                                   | Enrichment Score: 1.4678664420681806 |      |          |                 |
|-----------------------|-----------------------------------|--------------------------------------|------|----------|-----------------|
| Category              | Term                              | Count                                | %    | PValue   | Fold Enrichment |
| GOTERM_CC_FAT         | GO:0030018~Z disc                 | 3                                    | 6.25 | 1.09E-02 | 18.52           |
| GOTERM_CC_FAT         | GO:0031674~I band                 | 3                                    | 6.25 | 1.53E-02 | 15.49           |
| GOTERM_CC_FAT         | GO:0030017~sarcomere              | 3                                    | 6.25 | 4.47E-02 | 8.70            |
| GOTERM_CC_FAT         | GO:0030016~myofibril              | 3                                    | 6.25 | 5.58E-02 | 7.68            |
| GOTERM_CC_FAT         | GO:0044449~contractile fiber part | 3                                    | 6.25 | 5.76E-02 | 7.54            |
| GOTERM_CC_FAT         | GO:0043292~contractile fiber      | 3                                    | 6.25 | 6.50E-02 | 7.04            |

| Annotation Cluster 12 |                                       | Enrichment Score: 1.3667793271236799 |      |          |                 |
|-----------------------|---------------------------------------|--------------------------------------|------|----------|-----------------|
| Category              | Term                                  | Count                                | %    | PValue   | Fold Enrichment |
| GOTERM_BP_FAT         | GO:0048514~blood vessel morphogenesis | 4                                    | 8.33 | 3.29E-02 | 5.58            |
| GOTERM_BP_FAT         | GO:0001568~blood vessel development   | 4                                    | 8.33 | 4.77E-02 | 4.80            |
| GOTERM_BP_FAT         | GO:0001944~vasculature development    | 4                                    | 8.33 | 5.06E-02 | 4.69            |

| Annotation Cluster 13 |                                                            | Enrichment Score: 1.3613681043910073 |      |          |                 |
|-----------------------|------------------------------------------------------------|--------------------------------------|------|----------|-----------------|
| Category              | Term                                                       | Count                                | %    | PValue   | Fold Enrichment |
| BIOCARTA              | h_malPathway:Role of MAL in Rho-Mediated Activation of SRF | 3                                    | 6.25 | 8.49E-03 | 18.91           |
| BIOCARTA              | h_rasPathway:Ras Signaling Pathway                         | 3                                    | 6.25 | 9.39E-03 | 17.96           |
| BIOCARTA              | h_p38mapkPathway:p38 MAPK Signaling Pathway                | 3                                    | 6.25 | 2.47E-02 | 10.89           |
| KEGG_PATHWAY          | hsa05211:Renal cell carcinoma                              | 3                                    | 6.25 | 6.35E-02 | 7.03            |
| KEGG_PATHWAY          | hsa04370:VEGF signaling pathway                            | 3                                    | 6.25 | 7.16E-02 | 6.56            |
| UP_SEQ_FEATURE        | propeptide:Removed in mature form                          | 3                                    | 6.25 | 1.09E-01 | 5.22            |
| KEGG_PATHWAY          | hsa04062:Chemokine signaling pathway                       | 3                                    | 6.25 | 3.03E-01 | 2.63            |

| Annotation Cluster 14 |                                                        | Enrichment Score: 1.3555925712828896 |       |          |                 |
|-----------------------|--------------------------------------------------------|--------------------------------------|-------|----------|-----------------|
| Category              | Term                                                   | Count                                | %     | PValue   | Fold Enrichment |
| GOTERM_BP_FAT         | GO:0070271~protein complex biogenesis                  | 6                                    | 12.50 | 2.54E-02 | 3.49            |
| GOTERM_BP_FAT         | GO:0006461~protein complex assembly                    | 6                                    | 12.50 | 2.54E-02 | 3.49            |
| GOTERM_BP_FAT         | GO:0065003~macromolecular complex assembly             | 6                                    | 12.50 | 6.85E-02 | 2.65            |
| GOTERM_BP_FAT         | GO:0043933~macromolecular complex subunit organization | 6                                    | 12.50 | 8.53E-02 | 2.49            |
